# Supplementary material for: Upregulation of peroxisome proliferator-activated receptor-α and the lipid metabolism pathway promotes carcinogenesis of ampullary cancer
Source: PubMed Central journal article supplement (PMC7738964; doi:10.7150/ijms.48123), 2021-01-01
Supplement: ijmsv18p0256s1.pdf [file ijmsv18p0256s1.pdf]

**Upregulation of peroxisome proliferator-activated receptor- $\alpha$  and the lipid metabolism pathway promotes carcinogenesis of ampullary cancer**

Chih-Yang Wang, Ying-Jui Chao, Yi-Ling Chen, Tzu-Wen Wang, Nam Nhut Phan, Hui-Ping Hsu, Yan-Shen Shan, Ming-Derg Lai

**Supplementary Table 1.** Demographics and clinical outcomes of five patients with ampullary cancer

| Age (years) | Sex | Staging         | Tumor size (cm) | Morphology | Differentiation | Recurrence | Time to recurrence (months) | Condition | Time of survival/ expired (months) |
|-------------|-----|-----------------|-----------------|------------|-----------------|------------|-----------------------------|-----------|------------------------------------|
| 51          | F   | T2N0, stage Ib  | 2×1×1           | Polypoid   | Unknown         | No         | --                          | Survived  | 193                                |
| 58          | F   | T2N0, stage Ib  | 2.4×1.5×0.6     | Mixed      | Good            | Yes        | 14                          | Expired   | 17                                 |
| 68          | M   | T3N0, stage IIA | 4.5×3.5×1.2     | Polypoid   | Good            | No         | --                          | Survived  | 162                                |
| 66          | M   | T3N0, stage IIA | 1×1×0.8         | Ulcerative | Good            | Yes        | 64                          | Expired   | 227                                |
| 60          | M   | T3N0, stage IIA | 2×1.8×1         | Mixed      | Moderate        | Yes        | 5.6                         | Expired   | 16.7                               |

**Supplementary Table 2.** Kyoto Encyclopedia of Genes and Genomes (KEGG) pathway enrichment analysis of an ampullary cancer microarray using the Database for Annotation, Visualization and Integrated Discovery (DAVID). This table contains only pathways with *p* values that ranged 0.0001~0.05.

| KEGG Pathway                                | <i>p</i> value | Genes                                                                                                  |
|---------------------------------------------|----------------|--------------------------------------------------------------------------------------------------------|
| Pentose and glucuronate interconversions    | 1.50E-04       | <i>UGT1A6, CRYL1, UGT1A8, AKR1B1, UGT2B11, UGT2A3, UGT2B10, UGT2B7, XYLB</i>                           |
| Drug metabolism                             | 1.63E-04       | <i>CYP3A4, XDH, UGT1A6, CYP3A5, CES2, CYP3A7, UGT1A8, NAT2, UGT2B11, DPYD, UGT2A3, UGT2B10, UGT2B7</i> |
| Maturity-onset diabetes of the young        | 2.43E-04       | <i>HNF1A, HNF4A, SLC2A2, PKLR, NEUROD1, HNF4G, PDX1, NR5A2, NKX2-2</i>                                 |
| Starch and sucrose metabolism               | 6.03E-04       | <i>GBA3, UGT1A6, G6PC, UGT1A8, ENPP3, MGAM, SI, UGT2B11, TREH, UGT2A3, UGT2B10, UGT2B7</i>             |
| Valine, leucine and isoleucine degradation  | 8.94E-04       | <i>ACAA2, ALDH6A1, ACADSB, ACADM, HMGCS2, ACADS, ABAT, ACAT1, HADHA, ACAA1, HADHB</i>                  |
| Alanine, aspartate and glutamate metabolism | 1.21E-03       | <i>ASPA, ACY3, GLS, ABAT, GPT, AGXT2, CPS1, AGXT, DDO</i>                                              |
| Glycine, serine and threonine metabolism    | 1.21E-03       | <i>GLYCK, SHMT1, CTH, MOA, AMT, BHMT, MAOB, AGXT2, AGXT</i>                                            |
| Fructose and mannose metabolism             | 2.30E-03       | <i>KHK, AKR1B15, MPI, PFKFB4, AKR1B10, PFKFB2, ALDOC, ALDOB, AKR1B1, FBP1</i>                          |
| Glycolysis / Gluconeogenesis                | 3.20E-03       | <i>G6PC, GALM, ADH4, ALDOC, PKLR, ALDOB, FBP1, ADH6, PGAM2, ACSS2, PCK2, PCK1</i>                      |
| ABC transporters                            | 3.48E-03       | <i>ABCA8, ABCG8, ABCG5, ABCB1, ABCC2, ABCA4, ABCC8, ABCA5, ABCG2, ABCC6</i>                            |
| Androgen and estrogen metabolism            | 4.04E-03       | <i>UGT1A6, UGT1A8, HSD17B2, UGT2B11, HSD11B2, HSD17B3, UGT2A3, UGT2B10, SULT1E1, UGT2B7</i>            |
| Nitrogen metabolism                         | 4.71E-03       | <i>CTH, CA7, AMT, GLS, CA4, CA2, CPS1</i>                                                              |
| Sulfur metabolism                           | 8.22E-03       | <i>CHST13, SULT1A2, SULT1A4, SULT1E1, BPNT1</i>                                                        |
| Histidine metabolism                        | 1.54E-02       | <i>DDC, ASPA, CNDP1, ACY3, MAOA, MAOB, FTCD</i>                                                        |

|                                      |          |                                                                      |
|--------------------------------------|----------|----------------------------------------------------------------------|
| Pantothenate and CoA biosynthesis    | 1.91E-02 | <i>PANK3, PANK1, ENPP3, VNN1, DPYD</i>                               |
| Tryptophan metabolism                | 2.23E-02 | <i>DDC, CYP1A1, MAOA, MAOB, HAAO, CAT, ACAT1, HADHA</i>              |
| Primary bile acid biosynthesis       | 2.40E-02 | <i>ACOX2, CYP27A1, CYP7A1, PIWIL2, SCP2</i>                          |
| Propanoate metabolism                | 2.44E-02 | <i>ALDH6A1, ACADM, SUCLG1, ABAT, ACSS2, ACAT1, HADHA</i>             |
| Porphyrin and chlorophyll metabolism | 2.81E-02 | <i>UGT1A6, ALAD, UGT1A8, HMOX1, UGT2B11, UGT2A3, UGT2B10, UGT2B7</i> |
| Renin-angiotensin system             | 2.97E-02 | <i>ACE, ACE2, MME, ANPEP, ENPEP</i>                                  |
| Ascorbate and aldarate metabolism    | 2.97E-02 | <i>UGT1A6, UGT1A8, UGT2B11, UGT2A3, UGT2B10, UGT2B7</i>              |
| Butanoate metabolism                 | 3.22E-02 | <i>AKR1B15, HMGCS2, ACADS, AKR1B10, ABAT, BDH2, ACAT1, HADHA</i>     |
| Galactose metabolism                 | 3.52E-02 | <i>GALK1, G6PC, AKR1B1, MGAM, GALT, LCT</i>                          |
| Glycerolipid metabolism              | 3.99E-02 | <i>DGKA, GLYCTK, PNLIPRP2, DGAT1, DGAT2, DAK, AKR1B1, GK</i>         |

---

**Supplementary Table 3.** Functional enrichment of Gene Ontology (GO) biological processes analysis in a cDNA microarray of ampullary adenocarcinomas by the Database for Annotation, Visualization and Integrated Discovery (DAVID)

| GO term                      | <i>p</i> value | Genes                                                                                                                                                                                                                                                                                                                                                                                                                                                                                                                                                                                                                                                                   |
|------------------------------|----------------|-------------------------------------------------------------------------------------------------------------------------------------------------------------------------------------------------------------------------------------------------------------------------------------------------------------------------------------------------------------------------------------------------------------------------------------------------------------------------------------------------------------------------------------------------------------------------------------------------------------------------------------------------------------------------|
| Digestion                    | 1.35E-13       | <i>SLC15A1, SLC5A1, PRSSI, VIPR1, SCTR, APOA4, VDR, SCT, UGT1A6, ACE, UGT1A8, PLA2G1B, NPC1L1, SOAT2, MOGAT2, PNLIPRP2, SULT2A1, PPARGC1A, ABCG8, SSTR2, ABCG5, AKR1B15, SSTR1, AKR1B10, MEP1A, ACE2, MEP1B, GHRL, FABP1, FABP2, SST</i>                                                                                                                                                                                                                                                                                                                                                                                                                                |
| Fatty acid metabolic process | 1.99E-13       | <i>ACOX2, HACL1, ACOX1, PPARA, ACADSB, CYP2J2, CPT2, HNF1A, EDN2, ECHDC2, ACSF3, ACSF2, HADHA, HADHB, AKR1C3, PECR, CRYL1, ACOT11, PLA2G1B, ETFDH, ELOVL7, BDH2, ACSL6, ACSL5, ACAA2, PTGR1, ACADM, LIPA, ACADS, EPHX2, DECR1, FADS6, PPARGC1A, CYP4F8, CYP4F3, FABP2, CYP4F2, SLC27A3, HPGD, SLC27A2, CROT, SLC27A4, ACAA1</i>                                                                                                                                                                                                                                                                                                                                         |
| Oxidation reduction          | 2.23E-13       | <i>ALDH8A1, ACOX2, CYP3A4, ACOX1, CYP3A5, HTATIP2, CYP3A7, CYP2J2, CYP2C19, CYP2C18, CYP2S1, CYP2D6, AKR1C3, GSR, PECR, MSRA, HMOX1, CYP7A1, GPX3, AKR7A2, AKR7A3, PIWIL2, CAT, ALDH6A1, ACADM, CYP1A1, ACADS, CYB5A, DECR1, DHRS7C, PPARGC1A, DDO, POR, DHDH, RDH5, DHRS1, AKR1B15, CYP27A1, AKR1B10, CYBRD1, HSD11B2, PRODH, HSD17B11, ME1, XDH, ACADSB, HSD17B2, CYP2B6, ADH6, HADHA, ALDH1A1, FMO4, FMO5, CBR1, ADH4, ETFDH, HAAO, BDH2, HSD17B3, GLRX, AKR7L, GPD1, PAOX, PTGR1, CYP2C9, MAOA, MAOB, DHRS11, CYP4F11, CYP4F12, CYP4V2, PHYH, FADS6, IDH3A, IYD, CYP4B1, SDHA, ADII, CYP4F8, AKR1B1, PRODH2, CYP4F3, DPYD, CYP4F2, ACAD11, HPGD, RETSAT, CRYZL1</i> |
| Carboxylic acid transport    | 1.55E-11       | <i>SLC36A1, PPARA, CPT2, HNF1A, SLC16A10, DRD4, SLC7A9, SLC19A1, AGXT, SLC7A7, MIP, SLC25A20, SLC23A1, ACE, PLIN2, SLC1A7, SLC22A4, PLA2G1B, SLC22A5, SLC1A1, SLC6A12, SLC3A1, SLC10A2, SLC6A19, CD36, SLC26A8, SLC6A5, FABP1, FABP2, SLC25A15, PDZK1, SLC46A1, CROT, SLC27A4</i>                                                                                                                                                                                                                                                                                                                                                                                       |
| Organic acid transport       | 1.89E-11       | <i>SLC36A1, PPARA, CPT2, HNF1A, SLC16A10, DRD4, SLC7A9, SLC19A1, AGXT, SLC7A7, MIP, SLC25A20, SLC23A1, ACE, PLIN2, SLC1A7, SLC22A4, PLA2G1B, SLC22A5, SLC1A1, SLC6A12, SLC3A1, SLC10A2, SLC6A19, CD36, SLC26A8,</i>                                                                                                                                                                                                                                                                                                                                                                                                                                                     |

|                                  |          |                                                                                                                                                                                                                                                                                                                               |
|----------------------------------|----------|-------------------------------------------------------------------------------------------------------------------------------------------------------------------------------------------------------------------------------------------------------------------------------------------------------------------------------|
|                                  |          | <i>SLC6A5, FABP1, FABP2, SLC25A15, PDZK1, SLC46A1, CROT, SLC27A4</i>                                                                                                                                                                                                                                                          |
| Lipid transport                  | 2.39E-10 | <i>PPARA, CPT2, MSRI, HNF1A, ATP10A, DRD4, APOC2, ABCA4, APOA4, SLC25A20, APOB, ACE, APOA1, PLIN2, APOC3, APOH, PLA2G1B, NPC1L1, SCARB1, GLTPD2, APOM, SOAT2, MTTP, ABCG8, ABCG5, CD36, FABP1, FABP2, SCP2, CROT, APOL5, SLC27A4</i>                                                                                          |
| Lipid localization               | 4.48E-10 | <i>PPARA, CPT2, MSRI, HNF1A, ATP10A, DRD4, APOC2, ABCA4, ACVR1C, APOA4, SLC25A20, APOB, ACE, APOA1, PLIN2, APOC3, APOH, PLA2G1B, NPC1L1, SCARB1, GLTPD2, APOM, SOAT2, MTTP, ABCG8, ABCG5, CD36, FABP1, FABP2, SCP2, CROT, APOL5, SLC27A4</i>                                                                                  |
| Steroid metabolic process        | 4.87E-10 | <i>HSD17B11, CYP3A4, ACOX2, CYP3A5, HNF1A, HSD17B2, APOA4, SULT4A1, UGT1A6, APOB, APOA1, UGT1A8, CYP7A1, APOC3, NPC1L1, SULT1A2, PIWIL2, HSD17B3, SCARB1, CAT, SULT1E1, SULT1A4, SOAT2, ACAA2, LIPA, SULT2A1, CYP1A1, NR0B2, GBA2, G6PC, NR1I2, AKR1B15, HMGCS2, CYP27A1, SULT1B1, AKR1B10, UGT2B11, HSD11B2, NR5A2, SCP2</i> |
| Triglyceride metabolic process   | 1.02E-09 | <i>MOGAT2, PNLIPRP2, APOC2, CPS1, PCK1, MTTP, APOA4, APOB, G6PC, DGAT1, DGAT2, APOC3, AGPAT9, APOH, SLC22A4, CAT, NRIH3</i>                                                                                                                                                                                                   |
| Regulation of hormone levels     | 2.98E-09 | <i>ALDH8A1, HSD17B11, EDN3, HNF1A, FAM3B, PDX1, FKBP1B, PCSK2, UGT1A6, PCSK1, ACE, APOA1, UGT1A8, ADH4, SCARB1, SULT1E1, PCSK5, SHBG, CYP1A1, TBX3, DDO, DGAT1, LRAT, GHRH, SULT1B1, UGT2B11, ACE2, NEUROD1, HSD11B2, GHRL, SMPD3, RETSAT</i>                                                                                 |
| Organic ether metabolic process  | 4.30E-09 | <i>MOGAT2, PNLIPRP2, CYP1A1, APOC2, CPS1, PCK1, MTTP, APOA4, APOB, G6PC, DGAT1, DGAT2, APOC3, AGPAT9, APOH, SLC22A4, CAT, NRIH3</i>                                                                                                                                                                                           |
| Lipid catabolic process          | 5.68E-09 | <i>HSD17B11, ACOX2, ENPP6, HACL1, ACOX1, CPT2, APOC2, HADHA, HADHB, APOA4, PLCB3, APOB, SMPDL3B, SMPDL3A, CYP7A1, PLA2G12B, APOC3, ETFDH, PLA2G1B, SCARB1, BDH2, PLD1, ACADM, LIPA, PNLIPRP2, SULT2A1, ACADS, DECR1, CPS1, GBA2, PLA2G2A, SMPD3, ACAA1</i>                                                                    |
| Cellular lipid catabolic process | 8.88E-09 | <i>ACOX2, HACL1, ACOX1, PLD1, ACADM, CPT2, ACADS, DECR1, CPS1, HADHA, HADHB, GBA2, PLCB3, APOB, SMPDL3B, SMPDL3A, APOC3, ETFDH, BDH2, SMPD3, ACAA1</i>                                                                                                                                                                        |

|                                     |          |                                                                                                                                                                                                                                                                                                          |
|-------------------------------------|----------|----------------------------------------------------------------------------------------------------------------------------------------------------------------------------------------------------------------------------------------------------------------------------------------------------------|
| Acylglycerol<br>metabolic process   | 9.19E-09 | <i>MOGAT2, PNLIPRP2, APOC2, CPS1, PCK1, MTPP, APOA4, APOB, G6PC, DGAT1, DGAT2, APOC3, AGPAT9, APOH, SLC22A4, CAT, NRIH3</i>                                                                                                                                                                              |
| Neutral lipid<br>metabolic process  | 1.28E-08 | <i>MOGAT2, PNLIPRP2, APOC2, CPS1, PCK1, MTPP, APOA4, APOB, G6PC, DGAT1, DGAT2, APOC3, AGPAT9, APOH, SLC22A4, CAT, NRIH3</i>                                                                                                                                                                              |
| Sterol<br>homeostasis               | 1.33E-08 | <i>SOAT2, APOC2, MTPP, ABCG8, APOA4, APOB, G6PC, ABCG5, MALL, APOA1, APOC3, NPC1L1, SCARB1, NR5A2, APOM</i>                                                                                                                                                                                              |
| Cholesterol<br>homeostasis          | 1.33E-08 | <i>SOAT2, APOC2, MTPP, ABCG8, APOA4, APOB, G6PC, ABCG5, MALL, APOA1, APOC3, NPC1L1, SCARB1, NR5A2, APOM</i>                                                                                                                                                                                              |
| Glycerol ether<br>metabolic process | 1.76E-08 | <i>MOGAT2, PNLIPRP2, APOC2, CPS1, PCK1, MTPP, APOA4, APOB, G6PC, DGAT1, DGAT2, APOC3, AGPAT9, APOH, SLC22A4, CAT, NRIH3</i>                                                                                                                                                                              |
| Fatty acid<br>transport             | 1.96E-08 | <i>PPARA, SLC25A20, ACE, CPT2, CD36, HNF1A, PLIN2, DRD4, PLA2G1B, FABP1, FABP2, CROT, SLC27A4</i>                                                                                                                                                                                                        |
| Cofactor<br>metabolic process       | 3.23E-08 | <i>MOCOS, ME1, ALAD, HNF1A, ALDOB, GGT1, PDSS1, GCH1, TPK1, UGT1A6, GSR, CBRI, UGT1A8, HMOX1, ADH4, GPX3, HAAO, VNN1, ACSL6, MOCSI, GPD1, SHMT1, ACO2, CYP1A1, SUCLG1, FTCD, IDH3A, SDHA, COQ4, CTH, PANK3, HNF4A, PANK1, QPRT, CRYZL1</i>                                                               |
| Sterol transport                    | 8.51E-08 | <i>SOAT2, HNF1A, MSRI, APOC2, ABCG8, APOA4, APOB, ABCG5, CD36, APOA1, APOC3, NPC1L1, SCARB1, APOM</i>                                                                                                                                                                                                    |
| Cholesterol<br>transport            | 8.51E-08 | <i>SOAT2, HNF1A, MSRI, APOC2, ABCG8, APOA4, APOB, ABCG5, CD36, APOA1, APOC3, NPC1L1, SCARB1, APOM</i>                                                                                                                                                                                                    |
| Lipid homeostasis                   | 1.29E-07 | <i>SOAT2, APOC2, MTPP, ABCG8, APOA4, APOB, G6PC, ABCG5, APOA1, MALL, HNF4A, APOC3, NPC1L1, SCARB1, NR5A2, APOM</i>                                                                                                                                                                                       |
| Response to toxin                   | 2.86E-07 | <i>DDC, TRPM6, PTGRI, CYP1A1, SLC6A4, EPHX2, BPHL, GUCY2C, AQP10, BAK1, SLC23A1, CDKN1A, PEBP1, HTR1D, PDZD3, MT1H, MPST</i>                                                                                                                                                                             |
| Secretion                           | 3.52E-07 | <i>EDN3, SLC22A18, HNF1A, TRPV1, FAM3B, DRD4, NR3C2, CCL8, AQP7, PDX1, TPD52, AMN, AGXT, FKBP1B, AQP3, STXBP5L, SCTR, SCT, ACE, HMOX1, KCNK5, PLA2G1B, SLC22A4, GUCA2B, PCSK5, SCG2, SCAMP5, TBX3, BAIAP3, ABCG8, SLC26A3, ABCG5, TRIM36, DGAT1, GHRH, SCIN, GHRL, NEUROD1, CA2, DOC2B, SMPD3, MON1A</i> |
| Chemical<br>homeostasis             | 4.52E-07 | <i>JPH4, HNF1A, GRIK1, EDN2, GNA11, GRIK3, F2RL1, PDX1, APOA4, BAK1, APOB, APOA1, MALL, GRIN2B, AQP11, HMOX1,</i>                                                                                                                                                                                        |

|                                   |          |                                                                                                                                                                                                                                                                                                                                                                                                                                                                                                                                                                                                                                                  |
|-----------------------------------|----------|--------------------------------------------------------------------------------------------------------------------------------------------------------------------------------------------------------------------------------------------------------------------------------------------------------------------------------------------------------------------------------------------------------------------------------------------------------------------------------------------------------------------------------------------------------------------------------------------------------------------------------------------------|
|                                   |          | <i>RGN, NPC1L1, CHRNA7, CHRFAM7A, APOM, OTC, MLXIPL, GRIN2A, SLC9A3R1, PPARGC1A, CCR9, G6PC, HNF4A, GHRH, GHRL, MON1A, CALCR, PRKCZ, CCK, SLC37A4, DRD4, NR3C2, APOC2, FKBP1B, VDR, APOC3, SCARB1, SLC39A4, MT1H, GAL3ST1, SOAT2, EPHX2, ATP1A4, AFG3L2, CPS1, CCL15, PCK1, MTPP, ABCG8, ABCG5, ADRA1B, NEUROD1, NR5A2, SCARA5, IL2</i>                                                                                                                                                                                                                                                                                                          |
| Monocarboxylic acid transport     | 6.65E-07 | <i>PPARA, HNF1A, CPT2, DRD4, SLC10A2, MIP, SLC25A20, ACE, CD36, PLIN2, PLA2G1B, FABP1, FABP2, CROT, SLC27A4</i>                                                                                                                                                                                                                                                                                                                                                                                                                                                                                                                                  |
| Lipoprotein particle clearance    | 1.15E-06 | <i>APOB, MSR1, CD36, APOA1, HMOX1, APOC3, APOC2, SCARB1, APOM</i>                                                                                                                                                                                                                                                                                                                                                                                                                                                                                                                                                                                |
| Intestinal absorption             | 1.15E-06 | <i>ABCG8, VDR, SOAT2, MOGAT2, ABCG5, SLC5A1, NPC1L1, FABP1, FABP2</i>                                                                                                                                                                                                                                                                                                                                                                                                                                                                                                                                                                            |
| Lipid oxidation                   | 1.38E-06 | <i>ACOX2, ACOX1, HAACL1, CPT2, ACADM, ACADS, DECR1, PPARGC1A, HADHA, HADHB, ETFDH, BDH2, ACAA1</i>                                                                                                                                                                                                                                                                                                                                                                                                                                                                                                                                               |
| Fatty acid oxidation              | 1.38E-06 | <i>ACOX2, ACOX1, HAACL1, CPT2, ACADM, ACADS, DECR1, PPARGC1A, HADHA, HADHB, ETFDH, BDH2, ACAA1</i>                                                                                                                                                                                                                                                                                                                                                                                                                                                                                                                                               |
| Organic acid catabolic process    | 1.62E-06 | <i>ACOX2, HAACL1, SHMT1, ALDH6A1, ACOX1, ACADM, CPT2, SULT2A1, ACADS, AMT, DECR1, TAT, DDO, HADHA, HADHB, ASPA, GLS, ETFDH, PRODH2, BDH2, ACAA1, PRODH</i>                                                                                                                                                                                                                                                                                                                                                                                                                                                                                       |
| Carboxylic acid catabolic process | 1.62E-06 | <i>ACOX2, HAACL1, SHMT1, ALDH6A1, ACOX1, ACADM, CPT2, SULT2A1, ACADS, AMT, DECR1, TAT, DDO, HADHA, HADHB, ASPA, GLS, ETFDH, PRODH2, BDH2, ACAA1, PRODH</i>                                                                                                                                                                                                                                                                                                                                                                                                                                                                                       |
| Fatty acid beta-oxidation         | 2.28E-06 | <i>ACOX2, ACOX1, CPT2, ACADM, ACADS, ETFDH, BDH2, DECR1, HADHA, ACAA1, HADHB</i>                                                                                                                                                                                                                                                                                                                                                                                                                                                                                                                                                                 |
| Ion transport                     | 2.31E-06 | <i>KCNJ16, SLC36A1, JPH4, SLC5A4, SLC22A18, CPT2, GRIK1, GABRB2, TRPV1, SLC20A2, SLC5A1, GRIK3, KCNJ13, KCNK10, SLC25A20, SLC23A1, GRIN2B, AQP11, KCNK5, SLC22A4, CHRNA7, ANO4, SLC22A5, TRPV6, SLC4A4, CHRFAM7A, SLC1A1, ANO9, GABRG1, SGK1, TRPM6, CLCA1, GRIN2A, CNGA1, SLC26A3, SLC26A8, CATSPER2, CATSPER3, CLIC5, SLC41A2, KCNH6, AKAP7, SLC30A10, MPST, CAV2, SLC39A14, ORA11, ENPP3, RHBG, CCL8, KCNA3, KCNJ3, FKBP1B, BEST4, VDR, TMEM37, SLCO1A2, SLC4A7, SLC39A5, SLC39A4, HCN4, CAMK2A, SLC31A1, GABRA1, SLCO4C1, ATP1A4, ATP1A1, SLC10A2, P2RX6, KCNJ6, SLC17A4, SLC13A2, KCTD16, PDZK1, SCARA5, ABCC8, PDZD3, SLC5A11, SLC5A12</i> |



|                                    |          |                                                                                                                                                                                                                                                                                                                                                                                                                                                                                                                                                   |
|------------------------------------|----------|---------------------------------------------------------------------------------------------------------------------------------------------------------------------------------------------------------------------------------------------------------------------------------------------------------------------------------------------------------------------------------------------------------------------------------------------------------------------------------------------------------------------------------------------------|
| Coenzyme<br>metabolic process      | 2.89E-06 | <i>ME1, MOCOS, ALDOB, GGT1, PDSSI, GCHI, TPK1, GSR, GPX3, HAAO, VNNI, ACSL6, MOCSI, SHMT1, GPD1, ACO2, SUCLG1, FTCD, IDH3A, SDHA, COQ4, CTH, PANK3, HNF4A, PANK1, QPRT</i>                                                                                                                                                                                                                                                                                                                                                                        |
| Fatty acid<br>catabolic process    | 4.12E-06 | <i>ACOX2, HAACL1, ACOX1, CPT2, ACADM, ACADS, ETFDH, BDH2, DECR1, HADHA, ACAA1, HADHB</i>                                                                                                                                                                                                                                                                                                                                                                                                                                                          |
| Cholesterol efflux                 | 5.75E-06 | <i>APOA4, ABCG8, SOAT2, ABCG5, APOA1, APOC3, APOC2, SCARB1, APOM</i>                                                                                                                                                                                                                                                                                                                                                                                                                                                                              |
| Transmembrane<br>transport         | 6.80E-06 | <i>SLC5A4, SLC22A18, CPT2, TRPV1, SLC5A1, MFSD2A, AQP7, AQP3, SLC25A20, SLC2A7, SLC23A1, APOA1, SLC2A5, SLC23A3, SLC2A2, SLC22A4, TRPV6, SLC22A5, FLVCR2, FLVCR1, TRPM6, SLC25A5, ABCC13, CNGA1, SLC26A3, SLC26A8, SLC25A34, CATSPER2, CATSPER3, SLC37A2, KCNH6, SLC30A10, SLC2A12, SLC39A14, SLC37A4, RHBG, KCNA3, SLC19A1, SLC47A2, MIP, SCARB1, SLC39A5, HCN4, SLC39A4, SLC2A9, ATP1A4, ABCB1, AQP10, SLC17A4, SLC13A2, ABCC2, SLC46A3, SCARA5, SLC25A15, ABCC8, PDZK1, SLC46A1, SLC5A11, SLC25A18, ABCC6, SLC5A12</i>                         |
| Carbohydrate<br>transport          | 8.73E-06 | <i>SLC2A12, SLC2A9, SLC5A4, SLC5A1, SLC37A4, AQP7, SLC2A7, G6PC, SLC2A5, AQP11, SLC2A2, SLC37A2, PLA2G1B, SCARB1, SLC5A11</i>                                                                                                                                                                                                                                                                                                                                                                                                                     |
| Response to<br>nutrient levels     | 1.20E-05 | <i>PPARA, CCK, HSD17B2, ALDOB, AQP3, VDR, PCSK1, UGT1A6, UGT1A8, CDKN2B, HMOX1, APOM, SOAT2, CYP1A1, ACADS, SI, CPS1, PPARGC1A, SLC6A19, SSTR2, G6PC, ABCG5, HMGCS2, GHRH, SSTR1, HSD11B2, GHRL, SST, LCT, KLF4</i>                                                                                                                                                                                                                                                                                                                               |
| Homeostatic<br>process             | 1.23E-05 | <i>XRCC5, JPH4, HNF1A, GRIK1, TRPV1, PDIA2, GNA11, EDN2, GRIK3, F2RL1, PDX1, APOA4, GSR, BAK1, APOB, APOA1, MALL, GRIN2B, AQP11, HMOX1, RGN, NPC1L1, CHRNA7, SLC22A5, CHRFAM7A, APOM, MB, FLVCR1, OTC, MLXIPL, GRIN2A, SLC9A3R1, PPARGC1A, CCR9, G6PC, HNF4A, GHRH, GHRL, MONIA, CALCR, XDH, PRKCZ, CCK, SLC37A4, DRD4, NR3C2, APOC2, SOX6, TRIM10, FKBP1B, VDR, APOC3, HAAO, SCARB1, SLC39A4, MT1H, GAL3ST1, GLRX, SOAT2, LIPA, TNFRSF13B, EPHX2, ATP1A4, AFG3L2, CPS1, CCL15, PCK1, MTPP, ABCG8, ABCG5, ADRA1B, NEUROD1, NR5A2, SCARA5, IL2</i> |
| Long-chain fatty<br>acid transport | 1.39E-05 | <i>SLC25A20, ACE, CPT2, CD36, PLIN2, DRD4, PLA2G1B, FABP1, FABP2</i>                                                                                                                                                                                                                                                                                                                                                                                                                                                                              |

|                                                  |          |                                                                                                                                                                                                                                                                                                                                                                                                                               |
|--------------------------------------------------|----------|-------------------------------------------------------------------------------------------------------------------------------------------------------------------------------------------------------------------------------------------------------------------------------------------------------------------------------------------------------------------------------------------------------------------------------|
| Digestive system process                         | 1.65E-05 | <i>ABCG8, VDR, SOAT2, SCT, MOGAT2, ABCG5, SLC5A1, NPC1L1, GHRL, FABP1, FABP2</i>                                                                                                                                                                                                                                                                                                                                              |
| Vitamin metabolic process                        | 2.47E-05 | <i>ME1, CYP3A4, ALDH8A1, SHMT1, ACADM, CYP1A1, RBP2, SLC19A3, TPK1, CBR1, LRAT, ADH4, HAAO, SLC22A4, QPRT, RETSAT</i>                                                                                                                                                                                                                                                                                                         |
| Glycerolipid metabolic process                   | 2.49E-05 | <i>PIP5K1B, APOC2, APOA4, APOB, PIP5KL1, APOA1, APOC3, AGPAT9, APOH, SLC22A4, PLA2G1B, CAT, NR1H3, GPD1, MOGAT2, PLD1, PNLIPRP2, CPS1, PCK1, MTPP, G6PC, DGAT1, DGAT2, SEMA6D, PLA2G2A</i>                                                                                                                                                                                                                                    |
| Protein-lipid complex assembly                   | 2.73E-05 | <i>APOA4, SOAT2, APOB, APOA1, DGAT1, APOC3, APOM</i>                                                                                                                                                                                                                                                                                                                                                                          |
| Plasma lipoprotein particle assembly             | 2.73E-05 | <i>APOA4, SOAT2, APOB, APOA1, DGAT1, APOC3, APOM</i>                                                                                                                                                                                                                                                                                                                                                                          |
| Response to carbohydrate stimulus                | 3.51E-05 | <i>ME1, HNF1A, PFKFB2, SI, ALDOB, FKBP1B, ACVR1C, KHK, PCSK1, APOB, SARMI, HNF4A, NEUROD1, LCT</i>                                                                                                                                                                                                                                                                                                                            |
| Response to extracellular stimulus               | 3.59E-05 | <i>PPARA, CCK, HSD17B2, ALDOB, AQP3, VDR, PCSK1, UGT1A6, UGT1A8, CDKN2B, HMOX1, APOM, SOAT2, CYP1A1, ACADS, SI, CPS1, PPARGC1A, SLC6A19, CDKN1A, SSTR2, G6PC, ABCG5, HMGCS2, GHRH, SSTR1, HSD11B2, GHRL, SST, LCT, KLF4</i>                                                                                                                                                                                                   |
| Cellular amino acid derivative metabolic process | 3.74E-05 | <i>ENPP6, DRD4, GGT1, AGMAT, GCHI, APOA4, GSR, PADI6, APOA1, GPX3, SLC22A4, PLA2G1B, VNN1, SULT1A2, SULT1A4, DDC, ACADM, CYP1A1, MAOA, GRIN2A, CPS1, CKMT1A, CTH, SULT1B1, ABAT</i>                                                                                                                                                                                                                                           |
| Lipid modification                               | 3.87E-05 | <i>ACOX2, HACL1, SOAT2, ACOX1, ACADM, CPT2, ACADS, DECR1, PPARGC1A, HADHA, HADHB, ETFDH, B4GALNT2, BDH2, ACAA1</i>                                                                                                                                                                                                                                                                                                            |
| Cation transport                                 | 4.40E-05 | <i>KCNJ16, SLC36A1, JPH4, SLC5A4, SLC22A18, CPT2, SLC20A2, TRPV1, SLC5A1, KCNK10, KCNJ13, SLC25A20, SLC23A1, GRIN2B, KCNK5, SLC22A4, CHRNA7, SLC22A5, TRPV6, CHRFAM7A, SLC4A4, TRPM6, SGK1, CLCA1, GRIN2A, CNGA1, CATSPER2, CATSPER3, SLC41A2, KCNH6, SLC30A10, SLC39A14, ORA11, RHBG, CCL8, KCNA3, FKBP1B, KCNJ3, TMEM37, VDR, SLC4A7, SLC39A5, HCN4, SLC39A4, CAMK2A, SLC31A1, ATP1A4, ATP1A1, SLC10A2, KCNJ6, SLC17A4,</i> |

|                                                 |          |                                                                                                                                                                                                                                                                                                                                                                                                                              |
|-------------------------------------------------|----------|------------------------------------------------------------------------------------------------------------------------------------------------------------------------------------------------------------------------------------------------------------------------------------------------------------------------------------------------------------------------------------------------------------------------------|
|                                                 |          | <i>SLC13A2, KCTD16, ABCC8, SCARA5, PDZK1, SLC5A11, SLC5A12</i>                                                                                                                                                                                                                                                                                                                                                               |
| Metal ion transport                             | 4.81E-05 | <i>KCNJ16, JPH4, ORAI1, SLC39A14, SLC5A4, TRPV1, SLC20A2, SLC5A1, KCNA3, CCL8, KCNJ3, FKBP1B, KCNJ13, KCNK10, VDR, TMEM37, SLC23A1, GRIN2B, KCNK5, SLC22A4, SLC4A7, CHRNA7, SLC22A5, SLC39A5, TRPV6, SLC4A4, SLC39A4, HCN4, CHRFAM7A, SLC31A1, CAMK2A, SGK1, TRPM6, CLCA1, GRIN2A, ATP1A4, ATP1A1, SLC10A2, CNGA1, KCNJ6, CATSPER2, SLC17A4, CATSPER3, KCNH6, SLC13A2, KCTD16, SLC30A10, SCARA5, ABCC8, SLC5A11, SLC5A12</i> |
| Peptide transport                               | 5.36E-05 | <i>EDN3, HNF1A, DGAT1, SLC15A1, TRPV1, CDH17, GHRH, FAM3B, NEUROD1, GHRL, PDX1, FKBP1B, SMPD3</i>                                                                                                                                                                                                                                                                                                                            |
| Gluconeogenesis                                 | 6.01E-05 | <i>GPD1, G6PC, ALDOB, FBP1, PGAM2, GPT, PCK2, PPARGC1A, PCK1</i>                                                                                                                                                                                                                                                                                                                                                             |
| Alditol metabolic process                       | 6.01E-05 | <i>GALK1, GPD1, MOGAT2, DGAT2, DAK, GK, GDPD1, PCK1, GDPD2</i>                                                                                                                                                                                                                                                                                                                                                               |
| Amino acid transport                            | 6.13E-05 | <i>SLC36A1, CPT2, SLC16A10, SLC6A12, SLC7A9, SLC3A1, SLC19A1, SLC6A19, SLC7A7, SLC25A20, SLC6A5, SLC22A4, SLC22A5, SLC25A15, SLC1A1, PDZK1, SLC46A1</i>                                                                                                                                                                                                                                                                      |
| Response to drug                                | 6.58E-05 | <i>CAV2, APOBEC1, SLC22A18, AQP7, HADHA, SLC47A2, PCSK1, UGT1A6, UGT1A8, PLIN2, SLC22A5, NAT8B, NAT8, CYP1A1, GRIN2A, ABCB1, ATP1A1, CPS1, ABCG2, CDKN1A, ABCG5, HMGCS2, ABAT, PEBP1, NEUROD1, CA4, HSD11B2, SST, PDZK1, LCT, ABCC6</i>                                                                                                                                                                                      |
| Polyol metabolic process                        | 7.76E-05 | <i>GALK1, GPD1, MOGAT2, DGAT2, DAK, PPIP5K1, GK, ITPKA, GDPD1, PCK1, GDPD2</i>                                                                                                                                                                                                                                                                                                                                               |
| Xenobiotic metabolic process                    | 9.23E-05 | <i>CYP3A4, FMO4, UGT1A6, NR1I2, UGT1A8, HNF4A, CYP1A1, UGT2B11, EPHX2</i>                                                                                                                                                                                                                                                                                                                                                    |
| Regulation of cellular ketone metabolic process | 9.40E-05 | <i>APOA4, SLC25A20, PPARA, CPT2, HNF4A, BHMT, APOC3, MLXIPL, APOC2, FABP1, STRADB, PPARGC1A, NR1H3</i>                                                                                                                                                                                                                                                                                                                       |
| Peptide secretion                               | 9.73E-05 | <i>EDN3, HNF1A, DGAT1, TRPV1, GHRH, FAM3B, NEUROD1, GHRL, PDX1, FKBP1B, SMPD3</i>                                                                                                                                                                                                                                                                                                                                            |
| Hormone transport                               | 9.91E-05 | <i>SHBG, EDN3, HNF1A, DGAT1, TBX3, GHRH, FAM3B, NEUROD1, GHRL, PDX1, FKBP1B, SMPD3</i>                                                                                                                                                                                                                                                                                                                                       |
| Regulation of fatty acid metabolic process      | 9.91E-05 | <i>APOA4, SLC25A20, PPARA, CPT2, HNF4A, APOC3, MLXIPL, APOC2, FABP1, STRADB, PPARGC1A, NR1H3</i>                                                                                                                                                                                                                                                                                                                             |

|                                                     |          |                                                                                                                                                                                                                                                                 |
|-----------------------------------------------------|----------|-----------------------------------------------------------------------------------------------------------------------------------------------------------------------------------------------------------------------------------------------------------------|
| Monosaccharide metabolic process                    | 1.07E-04 | <i>PFKFB4, PFKFB2, ALDOC, SLC37A4, ALDOB, PGAM2, PDX1, GALK1, GALM, B4GALNT2, GPD1, HKDC1, PDK4, GALT, FBP1, RBKS, CHST5, PCK2, PPP1CC, CPS1, PPARGC1A, PCK1, KHK, G6PC, CHST6, PKLR, GHRL, GPT, XYL B</i>                                                      |
| Excretion                                           | 1.12E-04 | <i>ABCG8, SLC26A3, ABCG5, SLC22A18, TRPV1, HMOX1, KCNK5, NR3C2, AQP7, AMN, GUCA2B, AQP3, SCTR</i>                                                                                                                                                               |
| Pyruvate metabolic process                          | 1.21E-04 | <i>GPD1, G6PC, PFKFB2, ALDOB, FBP1, PGAM2, GPT, PCK2, AGXT, PPARGC1A, PCK1</i>                                                                                                                                                                                  |
| Positive regulation of fatty acid metabolic process | 1.31E-04 | <i>APOA4, PPARA, HNF4A, MLXIPL, APOC2, FABP1, PPARGC1A, NR1H3</i>                                                                                                                                                                                               |
| Regulation of secretion                             | 1.33E-04 | <i>EDN3, HNF1A, GRIK1, PFKFB2, EDN2, DRD4, KRT20, ADA, ACVR1C, PCSK1, APOA1, GRIN2B, HMOX1, PLA2G1B, TRPV6, RAB26, CASP1, NRG1, CAMK2A, SCAMP5, SIRT4, GCG, GHRH, SCIN, NEUROD1, GHRL, IL2</i>                                                                  |
| Lipid digestion                                     | 1.35E-04 | <i>APOA4, ABCG8, SOAT2, ABCG5, PLA2G1B, NPC1L1</i>                                                                                                                                                                                                              |
| Hormone metabolic process                           | 1.38E-04 | <i>ALDH8A1, HSD17B11, CYP1A1, DDO, PCSK2, PCSK1, UGT1A6, ACE, APOA1, UGT1A8, LRAT, SULT1B1, ADH4, UGT2B11, HSD11B2, SCARB1, SULT1E1, PCSK5, RETSAT</i>                                                                                                          |
| Nitrogen compound biosynthetic process              | 1.79E-04 | <i>MOCOS, ME1, ALAD, SEPHS2, HNF1A, NAGS, ATP10A, AGMAT, AGXT, ADA, GCH1, TPK1, PADI6, ARG2, ENTPD8, HAAO, SULT1A2, GUCA2B, GCHFR, MOCSI, DDC, SHMT1, OTC, ATP1A4, ATP1A1, CPS1, GUCY2C, AMPD1, AD11, CTH, ADCY9, BHMT, PRODH2, QPRT, DPYD, SLC25A15, PRODH</i> |
| Drug metabolic process                              | 1.93E-04 | <i>CYP3A4, CBRI, CYP1A1, CYP2C19, CYP2C9, CYP2D6, EPHX2</i>                                                                                                                                                                                                     |
| Reverse cholesterol transport                       | 1.93E-04 | <i>APOA4, APOA1, HNF1A, APOC3, APOC2, SCARB1, APOM</i>                                                                                                                                                                                                          |
| Hormone secretion                                   | 2.24E-04 | <i>EDN3, HNF1A, DGATI, TBX3, GHRH, FAM3B, NEUROD1, GHRL, PDX1, FKBP1B, SMPD3</i>                                                                                                                                                                                |
| Regulation of cholesterol storage                   | 2.36E-04 | <i>PPARA, APOB, MSRI, CD36, SCARB1, NR1H3</i>                                                                                                                                                                                                                   |
| Response to xenobiotic stimulus                     | 2.50E-04 | <i>CYP3A4, FMO4, UGT1A6, NR1I2, UGT1A8, HNF4A, CYP1A1, UGT2B11, EPHX2</i>                                                                                                                                                                                       |

|                                                |          |                                                                                                                                                                                                                                          |
|------------------------------------------------|----------|------------------------------------------------------------------------------------------------------------------------------------------------------------------------------------------------------------------------------------------|
| Glycerol<br>metabolic process                  | 2.50E-04 | <i>GPD1, MOGAT2, DGAT2, DAK, GK, GDPD1, PCK1, GDPD2</i>                                                                                                                                                                                  |
| Endocrine process                              | 2.50E-04 | <i>EDN3, ACE, TBX3, EDN2, ACE2, HSD11B2, GHRL, PCSK5</i>                                                                                                                                                                                 |
| Endocrine<br>pancreas<br>development           | 2.84E-04 | <i>INSM1, HNF1A, ONECUT2, NEUROD1, IL6R, PDX1, NKX2-2</i>                                                                                                                                                                                |
| Hexose<br>biosynthetic<br>process              | 3.20E-04 | <i>GPD1, G6PC, ALDOB, FBP1, PGAM2, GPT, PCK2, PPARGC1A, PCK1</i>                                                                                                                                                                         |
| Vitamin transport                              | 3.35E-04 | <i>SLC25A20, SLC23A1, CPT2, SLC22A4, SLC22A5, SLC19A1, PDZK1, SLC46A1</i>                                                                                                                                                                |
| Peptide hormone<br>secretion                   | 3.40E-04 | <i>EDN3, HNF1A, DGAT1, GHRH, FAM3B, NEUROD1, GHRL, PDX1, FKBP1B, SMPD3</i>                                                                                                                                                               |
| Betaine transport                              | 3.57E-04 | <i>SLC25A20, CPT2, SLC22A4, SLC22A5, PDZK1</i>                                                                                                                                                                                           |
| Carnitine<br>transport                         | 3.57E-04 | <i>SLC25A20, CPT2, SLC22A4, SLC22A5, PDZK1</i>                                                                                                                                                                                           |
| Amine transport                                | 5.13E-04 | <i>SLC36A1, CPT2, SLC16A10, SLC6A12, SLC6A4, SLC7A9, SLC3A1, SLC19A1, SLC6A19, SLC7A7, SLC25A20, SLC6A5, SLC22A4, SLC22A5, SLC25A15, PDZK1, SLC1A1, SLC46A1</i>                                                                          |
| Cellular hormone<br>metabolic process          | 5.57E-04 | <i>HSD17B11, ALDH8A1, UGT1A6, LRAT, APOA1, UGT1A8, CYP1A1, ADH4, UGT2B11, HSD11B2, SCARB1, SULT1E1, RETSAT</i>                                                                                                                           |
| Response to<br>glucocorticoid<br>stimulus      | 5.64E-04 | <i>CALCR, ACADS, SI, ALDOB, IL6R, CPS1, AGXT, TAT, PPARGC1B, PCSK1, UGT1A6, CDKN1A, UGT1A8, HSD11B2, PEBP1</i>                                                                                                                           |
| Regulation of<br>system process                | 6.34E-04 | <i>EDN3, PRKCZ, CCK, CYP2J2, GRIK1, GRIK3, EDN2, DRD4, FKBP1B, ADA, SYP, APOA4, ACE, APOA1, GRIN2B, HMOX1, ARG2, SLC22A5, LGII, HCN4, CAMK2A, EPHX2, GRIN2A, MYH7, ATP1A1, CPS1, ABCG8, SSTR2, ABCG5, ADRA1B, ACE2, PEBP1, GHRL, IL2</i> |
| Unsaturated fatty<br>acid metabolic<br>process | 6.51E-04 | <i>AKR1C3, CYP4F8, ACOX1, PTGR1, CYP2J2, EDN2, EPHX2, PLA2G1B, CYP4F3, CYP4F2, HPGD</i>                                                                                                                                                  |
| Cofactor transport                             | 7.64E-04 | <i>SLC25A20, CPT2, SLC22A4, SLC22A5, SLC19A1, PDZK1, SLC46A1</i>                                                                                                                                                                         |
| Macromolecular<br>complex<br>remodeling        | 7.64E-04 | <i>APOA4, APOB, APOC3, PLA2G2A, APOC2, SCARB1, APOM</i>                                                                                                                                                                                  |

|                                                |          |                                                                                                                                                                       |
|------------------------------------------------|----------|-----------------------------------------------------------------------------------------------------------------------------------------------------------------------|
| Plasma lipoprotein particle remodeling         | 7.64E-04 | <i>APOA4, APOB, APOC3, PLA2G2A, APOC2, SCARB1, APOM</i>                                                                                                               |
| Regulation of cholesterol transport            | 7.64E-04 | <i>APOA4, ABCG8, ABCG5, APOA1, APOC3, APOC2, NRIH3</i>                                                                                                                |
| Regulation of sterol transport                 | 7.64E-04 | <i>APOA4, ABCG8, ABCG5, APOA1, APOC3, APOC2, NRIH3</i>                                                                                                                |
| Protein-lipid complex remodeling               | 7.64E-04 | <i>APOA4, APOB, APOC3, PLA2G2A, APOC2, SCARB1, APOM</i>                                                                                                               |
| Regulation of lipid metabolic process          | 8.14E-04 | <i>PPARA, CPT2, MLXIPL, APOC2, ATP1A1, STRADB, PPARGC1A, SEC14L2, APOA4, SLC25A20, APOB, APOA1, HNF4A, APOC3, FABP1, APOM, NRIH3</i>                                  |
| Amine biosynthetic process                     | 8.17E-04 | <i>ADII, DDC, SHMT1, SEPHS2, CTH, NAGS, OTC, BHMT, PRODH2, SULT1A2, AGMAT, AGXT, PRODH, GCHI</i>                                                                      |
| Hexose metabolic process                       | 8.84E-04 | <i>GPDI, PFKFB4, PFKFB2, ALDOC, HKDC1, SLC37A4, PDK4, ALDOB, GALT, FBP1, PGAM2, PDX1, PPP1CC, PCK2, CPS1, PPARGC1A, PCK1, KHK, GALK1, GALM, G6PC, PKLR, GHRL, GPT</i> |
| Negative regulation of transport               | 9.10E-04 | <i>EDN3, CRYAA, SLC15A1, EDN2, DRD4, SIRT4, APOC2, ADA, ACVR1C, ABCG8, ABCG5, APOA1, HNF4A, HMOX1, APOC3, GHRL, NRG1, NRIH3, SCAMP5</i>                               |
| Response to inorganic substance                | 9.57E-04 | <i>XDH, APOBEC1, CYP1A1, ALDOB, PGAM2, MYH7, TAT, AQP3, ADA, APOA4, KHK, PCSK1, APOB, CDKN1A, HMOX1, GPX3, CYBRD1, HAAO, PEBP1, ABAT, CAT, CA2, MT1H, LCT, MB</i>     |
| Monosaccharide biosynthetic process            | 1.15E-03 | <i>GPDI, G6PC, ALDOB, FBP1, PGAM2, GPT, PCK2, PPARGC1A, PCK1</i>                                                                                                      |
| Triglyceride biosynthetic process              | 1.17E-03 | <i>MOGAT2, DGATI, DGAT2, AGPAT9, PCK1</i>                                                                                                                             |
| Positive regulation of lipid metabolic process | 1.22E-03 | <i>APOA4, PPARA, APOA1, HNF4A, MLXIPL, APOC2, FABP1, PPARGC1A, SEC14L2, NRIH3</i>                                                                                     |

|                                               |          |                                                                                                                                                                                                                                                                                                                                                                                                                                                                       |
|-----------------------------------------------|----------|-----------------------------------------------------------------------------------------------------------------------------------------------------------------------------------------------------------------------------------------------------------------------------------------------------------------------------------------------------------------------------------------------------------------------------------------------------------------------|
| Regulation of fatty acid biosynthetic process | 1.26E-03 | <i>APOA4, HNF4A, APOC3, MLXIPL, APOC2, NR1H3</i>                                                                                                                                                                                                                                                                                                                                                                                                                      |
| Response to corticosteroid stimulus           | 1.30E-03 | <i>CALCR, ACADS, SI, ALDOB, IL6R, CPS1, AGXT, TAT, PPARGC1B, PCSK1, UGT1A6, CDKN1A, UGT1A8, HSD11B2, PEBP1</i>                                                                                                                                                                                                                                                                                                                                                        |
| Lipid biosynthetic process                    | 1.35E-03 | <i>ALDH8A1, HSD17B11, HNF1A, HSD17B2, EDN2, ACSS2, PDSSI, PECR, APOA1, B3GNT5, AGPAT9, PLA2G1B, PIWIL2, NPC1L1, HSD17B3, SCARB1, ELOVL7, PCYT2, GAL3ST1, ACAA2, MOGAT2, PLD1, CYP1A1, CDS1, LPCAT3, FADS6, PCK1, DGAT1, HMGCS2, ST8SIA6, DGAT2, SEMA6D, HSD11B2, SCP2</i>                                                                                                                                                                                             |
| Cellular amide metabolic process              | 1.39E-03 | <i>ME1, GPD1, NAGS, ARG2, OTC, ALDOB, HAAO, QPRT, CPS1, SLC25A15, IDH3A</i>                                                                                                                                                                                                                                                                                                                                                                                           |
| Icosanoid metabolic process                   | 1.43E-03 | <i>AKR1C3, CYP4F8, ACOX1, PTGR1, CYP2J2, EDN2, PLA2G1B, CYP4F3, CYP4F2, HPGD</i>                                                                                                                                                                                                                                                                                                                                                                                      |
| Response to monosaccharide stimulus           | 1.43E-03 | <i>KHK, PCSK1, SARMI, HNF1A, HNF4A, PFKFB2, SI, NEUROD1, FKBP1B, ACVR1C</i>                                                                                                                                                                                                                                                                                                                                                                                           |
| Response to hexose stimulus                   | 1.43E-03 | <i>KHK, PCSK1, SARMI, HNF1A, HNF4A, PFKFB2, SI, NEUROD1, FKBP1B, ACVR1C</i>                                                                                                                                                                                                                                                                                                                                                                                           |
| Response to organic substance                 | 1.48E-03 | <i>PPARA, HNF1A, APOBEC1, TLR3, FOXO4, AGXT, ACVR1C, APOB, CDKN2B, GRIN2B, HMOX1, PLA2G1B, CHRNA7, CREB3L3, CASP1, CHRFAM7A, APOM, MB, PLD1, CYP1A1, ACADS, FBP1, GRIN2A, IL6R, TAT, PPARGC1B, HNF4A, ERN1, GHRL, HSD11B2, PEBP1, ABAT, CA4, CA2, LCT, ME1, CALCR, CAV2, ALDOC, PFKFB2, DRD4, ALDOB, ADH6, LIN28A, FKBP1B, GCH1, UGT1A6, PCSK1, UGT1A8, PLIN2, SCARB1, KAT2B, SI, CPS1, GNAT3, PCK1, GCG, KHK, CDKN1A, SARMI, ADCY9, HMGCS2, ADRA1B, NEUROD1, SST</i> |
| Biogenic amine metabolic process              | 1.53E-03 | <i>ENPP6, DDC, ACADM, MAOA, DRD4, GRIN2A, AGMAT, GCH1, APOA4, APOA1, SULT1B1, PLA2G1B, SLC22A4, SULT1A2, SULT1A4</i>                                                                                                                                                                                                                                                                                                                                                  |
| Sodium ion transport                          | 1.55E-03 | <i>SGK1, SLC5A4, SLC20A2, SLC5A1, ATP1A4, ATP1A1, SLC10A2, SLC23A1, CATSPER3, SLC17A4, SLC22A4, SLC13A2, SLC4A7, SLC22A5, HCN4, SLC4A4, SLC5A11, SLC5A12</i>                                                                                                                                                                                                                                                                                                          |

|                                            |          |                                                                                                                                                                                                                                                                                       |
|--------------------------------------------|----------|---------------------------------------------------------------------------------------------------------------------------------------------------------------------------------------------------------------------------------------------------------------------------------------|
| Glucose metabolic process                  | 1.57E-03 | <i>GPD1, PFKFB2, ALDOC, HKDC1, SLC37A4, PDK4, ALDOB, GALT, FBP1, PGAM2, PDX1, PPP1CC, CPS1, PCK2, PPARGC1A, PCK1, G6PC, PKLR, GHRL, GPT</i>                                                                                                                                           |
| Response to endogenous stimulus            | 1.58E-03 | <i>CALCR, ME1, CAV2, PPARA, APOBEC1, ALDOC, ALDOB, DRD4, FOXO4, AGXT, ACVR1C, UGT1A6, PCSK1, UGT1A8, HMOX1, PLA2G1B, MB, PLD1, KAT2B, ACADS, SI, GRIN2A, FBP1, IL6R, CPS1, TAT, PPARGC1B, PCK1, KHK, GCG, CDKN1A, ADCY9, HMGCS2, ADRA1B, PEBP1, GHRL, HSD11B2, CA4, CA2, SST, LCT</i> |
| Organic cation transport                   | 1.71E-03 | <i>SLC25A20, CPT2, SLC22A18, SLC22A4, RHBG, SLC22A5, PDZK1</i>                                                                                                                                                                                                                        |
| Positive regulation of cholesterol storage | 1.84E-03 | <i>APOB, MSRI, CD36, SCARB1</i>                                                                                                                                                                                                                                                       |
| Urea metabolic process                     | 1.86E-03 | <i>NAGS, ARG2, OTC, CPS1, SLC25A15</i>                                                                                                                                                                                                                                                |
| Urea cycle                                 | 1.86E-03 | <i>NAGS, ARG2, OTC, CPS1, SLC25A15</i>                                                                                                                                                                                                                                                |
| Lipoprotein transport                      | 1.86E-03 | <i>APOB, MSRI, APOBEC1, CD36, MTP</i>                                                                                                                                                                                                                                                 |
| Regulation of blood pressure               | 2.05E-03 | <i>EDN3, PPARA, EDN2, EPHX2, ATP1A1, GCHI, ACE, CHGA, HMOX1, ADRA1B, ACE2, ABAT, HSD11B2, GUCA2B, PCSK5</i>                                                                                                                                                                           |
| Coenzyme biosynthetic process              | 2.13E-03 | <i>MOCOS, ME1, TPK1, COQ4, PANK3, PANK1, HAAO, GGT1, QPRT, PDSSI, MOCSI, GCHI</i>                                                                                                                                                                                                     |
| Sterol metabolic process                   | 2.26E-03 | <i>ACAA2, SOAT2, HNF1A, LIPA, NR0B2, APOA4, APOB, APOA1, CYP27A1, HMGCS2, CYP7A1, APOC3, NPC1L1, SCARB1, CAT</i>                                                                                                                                                                      |
| Fructose metabolic process                 | 2.35E-03 | <i>KHK, PFKFB4, PFKFB2, ALDOC, ALDOB, FBP1</i>                                                                                                                                                                                                                                        |
| Regulation of lipoprotein lipase activity  | 2.35E-03 | <i>APOA4, APOC3, APOH, APOC2, FKBP1B, NRIH3</i>                                                                                                                                                                                                                                       |
| Cellular amino acid biosynthetic process   | 2.60E-03 | <i>ADII, SHMT1, CTH, SEPHS2, NAGS, OTC, BHMT, PRODH2, AGXT, PRODH</i>                                                                                                                                                                                                                 |
| Fat-soluble vitamin metabolic process      | 2.61E-03 | <i>CYP3A4, ALDH8A1, CBRI, LRAT, CYP1A1, ADH4, RBP2, RETSAT</i>                                                                                                                                                                                                                        |



|                                                         |          |                                                                                                                                                                                                                                                          |
|---------------------------------------------------------|----------|----------------------------------------------------------------------------------------------------------------------------------------------------------------------------------------------------------------------------------------------------------|
| Cholesterol metabolic process                           | 2.69E-03 | <i>ACAA2, SOAT2, HNF1A, NR0B2, APOA4, APOB, APOA1, CYP27A1, HMGCS2, CYP7A1, APOC3, NPC1L1, SCARB1, CAT</i>                                                                                                                                               |
| Regulation of digestive system process                  | 2.79E-03 | <i>APOA4, ABCG8, ABCG5, APOA1, SLC22A5</i>                                                                                                                                                                                                               |
| Amide biosynthetic process                              | 2.79E-03 | <i>NAGS, ARG2, OTC, CPS1, SLC25A15</i>                                                                                                                                                                                                                   |
| Positive regulation of fatty acid biosynthetic process  | 2.79E-03 | <i>APOA4, HNF4A, MLXIPL, APOC2, NR1H3</i>                                                                                                                                                                                                                |
| Response to hormone stimulus                            | 3.16E-03 | <i>CALCR, ME1, CAV2, PPARA, APOBEC1, ALDOB, FOXO4, AGXT, ACVR1C, UGT1A6, PCSK1, UGT1A8, HMOX1, PLA2G1B, MB, PLD1, KAT2B, ACADS, SI, FBP1, IL6R, CPS1, TAT, PPARGC1B, PCK1, KHK, GCG, CDKN1A, ADCY9, HMGCS2, PEBP1, GHRL, HSD11B2, CA4, CA2, SST, LCT</i> |
| Response to nutrient                                    | 3.44E-03 | <i>SOAT2, CYP1A1, HSD17B2, SI, SLC6A19, AQP3, VDR, UGT1A6, SSTR2, ABCG5, UGT1A8, CDKN2B, HMGCS2, SSTR1, HMOX1, SST, APOM, KLF4, LCT</i>                                                                                                                  |
| Negative regulation of multicellular organismal process | 3.49E-03 | <i>F11, GRIK1, GRIK3, APOC2, ATP1A1, IL6R, CXADR, FKBP1B, ADA, ABCG8, ABCG5, APOA1, HMOX1, ARG2, KLKB1, APOC3, APOH, GHRL, CHRNA7, CHRFAM7A, IL2</i>                                                                                                     |
| High-density lipoprotein particle clearance             | 3.52E-03 | <i>APOA1, APOC2, SCARB1, APOM</i>                                                                                                                                                                                                                        |
| Regulation of intestinal cholesterol absorption         | 3.52E-03 | <i>APOA4, ABCG8, ABCG5, APOA1</i>                                                                                                                                                                                                                        |
| Very-low-density lipoprotein particle assembly          | 3.52E-03 | <i>SOAT2, APOB, DGAT1, APOC3</i>                                                                                                                                                                                                                         |
| Response to metal ion                                   | 3.61E-03 | <i>XDH, APOBEC1, CYP1A1, ALDOB, PGAM2, TAT, AQP3, KHK, PCSK1, APOB, CYBRD1, HAAO, ABAT, PEBP1, CA2, MTHH, LCT</i>                                                                                                                                        |

|                                                                              |          |                                                                                                                                       |
|------------------------------------------------------------------------------|----------|---------------------------------------------------------------------------------------------------------------------------------------|
| Alcohol biosynthetic process                                                 | 3.66E-03 | <i>GPD1, G6PC, ALDOB, FBP1, PGAM2, GPT, PCK2, PPARGC1A, PCK1</i>                                                                      |
| Pancreas development                                                         | 3.71E-03 | <i>INSM1, PCSK1, HNF1A, ONECUT2, NEUROD1, IL6R, PDX1, NKX2-2</i>                                                                      |
| Phenol metabolic process                                                     | 3.71E-03 | <i>DDC, SULT1B1, MAOA, DRD4, GRIN2A, SULT1A2, SULT1A4, GCHI</i>                                                                       |
| Cellular carbohydrate catabolic process                                      | 3.89E-03 | <i>GPD1, ALDOC, HKDC1, PFKFB2, ALDOB, PGAM2, CPS1, GBA3, GBA2, G6PC, PKLR, MGAM, TREH</i>                                             |
| Quaternary ammonium group transport                                          | 3.99E-03 | <i>SLC25A20, CPT2, SLC22A4, SLC22A5, PDZK1</i>                                                                                        |
| Neutral lipid biosynthetic process                                           | 3.99E-03 | <i>MOGAT2, DGAT1, DGAT2, AGPAT9, PCK1</i>                                                                                             |
| Acylglycerol biosynthetic process                                            | 3.99E-03 | <i>MOGAT2, DGAT1, DGAT2, AGPAT9, PCK1</i>                                                                                             |
| Bile acid metabolic process                                                  | 4.01E-03 | <i>ACOX2, GBA2, HNF1A, SULT2A1, PIWIL2, NR5A2</i>                                                                                     |
| Regulation of systemic arterial blood pressure mediated by a chemical signal | 4.10E-03 | <i>EDN3, ACE, EDN2, ADRA1B, ACE2, HSD11B2, PCSK5</i>                                                                                  |
| Regulation of lipid biosynthetic process                                     | 4.23E-03 | <i>APOA4, APOB, HNF4A, APOC3, MLXIPL, APOC2, ATP1A1, SEC14L2, NRIH3</i>                                                               |
| Response to glucose stimulus                                                 | 4.23E-03 | <i>KHK, PCSK1, SARM1, HNF1A, HNF4A, PFKFB2, NEUROD1, FKBP1B, ACVR1C</i>                                                               |
| Cofactor biosynthetic process                                                | 4.29E-03 | <i>ME1, MOCOS, ALAD, HNF1A, GGT1, PDSSI, GCHI, COQ4, TPK1, PANK3, PANK1, HAAO, QPRT, MOCSI</i>                                        |
| Carboxylic acid biosynthetic process                                         | 4.29E-03 | <i>SHMT1, SEPHS2, PLD1, HNF1A, NAGS, OTC, EDN2, AGXT, FADS6, ADII, PECCR, CTH, BHMT, PLA2G1B, HAAO, PIWIL2, PRODH2, ELOVL7, PRODH</i> |

|                                                           |          |                                                                                                                                                                                              |
|-----------------------------------------------------------|----------|----------------------------------------------------------------------------------------------------------------------------------------------------------------------------------------------|
| Organic acid biosynthetic process                         | 4.29E-03 | <i>SHMT1, SEPHS2, PLD1, HNF1A, NAGS, OTC, EDN2, AGXT, FADS6, ADI1, PECCR, CTH, BHMT, PLA2G1B, HAAO, PIWIL2, PRODH2, ELOVL7, PRODH</i>                                                        |
| Negative regulation of secretion                          | 4.40E-03 | <i>EDN3, APOA1, HMOX1, EDN2, DRD4, SIRT4, GHRL, NRG1, ADA, ACVR1C</i>                                                                                                                        |
| Cellular aldehyde metabolic process                       | 4.97E-03 | <i>ALDH1A1, ALDH8A1, AKR1B15, ADH4, AKR1B10, AKR7A2, AKR7A3, AGXT</i>                                                                                                                        |
| Regulation of leukocyte migration                         | 5.09E-03 | <i>EDN3, HMOX1, EDN2, F2RL1, IL6R, ADA</i>                                                                                                                                                   |
| Regulation of systemic arterial blood pressure by hormone | 5.09E-03 | <i>EDN3, ACE, EDN2, ACE2, HSD11B2, PCSK5</i>                                                                                                                                                 |
| Quinone cofactor metabolic process                        | 5.50E-03 | <i>COQ4, CBRI, ADH4, PDSSI, CRYZLI</i>                                                                                                                                                       |
| Glycerol ether biosynthetic process                       | 5.50E-03 | <i>MOGAT2, DGAT1, DGAT2, AGPAT9, PCK1</i>                                                                                                                                                    |
| Regulation of cellular localization                       | 5.83E-03 | <i>EDN3, HNF1A, CRYAA, PFKFB2, EDN2, DRD4, SIRT4, KRT20, FKBP1B, ACVR1C, GCG, PCSK1, APOA1, HNF4A, GRIN2B, GHRH, HMOX1, PLA2G1B, NEUROD1, GHRL, TRPV6, RAB26, CASP1, CAMK2A, IL2, SCAMP5</i> |
| Negative regulation of sterol transport                   | 5.90E-03 | <i>ABCG8, ABCG5, APOC3, APOC2</i>                                                                                                                                                            |
| Negative regulation of cholesterol transport              | 5.90E-03 | <i>ABCG8, ABCG5, APOC3, APOC2</i>                                                                                                                                                            |
| Positive regulation of lipoprotein lipase activity        | 5.90E-03 | <i>APOA4, APOH, APOC2, NR1H3</i>                                                                                                                                                             |
| Glucose transport                                         | 5.96E-03 | <i>SLC2A9, G6PC, SLC2A5, SLC5A1, SLC2A2, SLC37A4, PLA2G1B</i>                                                                                                                                |
| Regulation of lipid storage                               | 6.37E-03 | <i>PPARA, APOB, MSRI, CD36, SCARB1, NR1H3</i>                                                                                                                                                |

|                                                   |          |                                                                                                                                                       |
|---------------------------------------------------|----------|-------------------------------------------------------------------------------------------------------------------------------------------------------|
| Positive regulation of lipid biosynthetic process | 6.37E-03 | <i>APOA4, HNF4A, MLXIPL, APOC2, SEC14L2, NRIH3</i>                                                                                                    |
| Endocrine system development                      | 6.70E-03 | <i>INSM1, PCSK1, APOA1, HNF1A, GHRH, ONECUT2, NEUROD1, IL6R, PDX1, MDK, NKX2-2</i>                                                                    |
| Lipoprotein metabolic process                     | 6.83E-03 | <i>APOA4, PPARA, APOB, APOBEC1, CD36, APOA1, SEMA6D, APOC3, NPC1L1, APOM, APOL5, MTTP</i>                                                             |
| Hexose transport                                  | 7.09E-03 | <i>SLC2A9, G6PC, SLC2A5, SLC5A1, SLC2A2, SLC37A4, PLA2G1B</i>                                                                                         |
| Regulation of lipid transport                     | 7.09E-03 | <i>APOA4, ABCG8, ABCG5, APOA1, APOC3, APOC2, NRIH3</i>                                                                                                |
| Carbohydrate homeostasis                          | 7.20E-03 | <i>G6PC, HNF1A, SLC37A4, MLXIPL, ADRA1B, NEUROD1, PDX1, PPARGC1A, PCK1</i>                                                                            |
| Glucose homeostasis                               | 7.20E-03 | <i>G6PC, HNF1A, SLC37A4, MLXIPL, ADRA1B, NEUROD1, PDX1, PPARGC1A, PCK1</i>                                                                            |
| Positive regulation of heart contraction          | 7.34E-03 | <i>EDN3, EDN2, ADRA1B, ATP1A1, ADA</i>                                                                                                                |
| Sulfur metabolic process                          | 7.36E-03 | <i>SEPHS2, GGT1, SLC19A3, CHST5, ADI1, TPK1, SULT4A1, GSR, MSRA, CTH, CHST6, BHMT, GPX3, CHST13, SEPP1</i>                                            |
| Regulation of heart rate                          | 7.85E-03 | <i>EDN3, EDN2, ADRA1B, MYH7, FKBP1B, ADA</i>                                                                                                          |
| Water-soluble vitamin metabolic process           | 7.97E-03 | <i>ME1, TPK1, SHMT1, ACADM, SLC22A4, HAAO, SLC19A3, QPRT</i>                                                                                          |
| Monosaccharide transport                          | 8.36E-03 | <i>SLC2A9, G6PC, SLC2A5, SLC5A1, SLC2A2, SLC37A4, PLA2G1B</i>                                                                                         |
| Response to peptide hormone stimulus              | 8.93E-03 | <i>PPARA, CAV2, PLD1, KAT2B, APOBEC1, SI, ALDOB, FBP1, IL6R, FOXO4, CPS1, PCK1, ACVR1C, KHK, PCSK1, HMGCS2, PLA2G1B, HSD11B2</i>                      |
| Intestinal cholesterol absorption                 | 9.03E-03 | <i>ABCG8, SOAT2, ABCG5, NPC1L1</i>                                                                                                                    |
| Response to steroid hormone stimulus              | 9.07E-03 | <i>CALCR, CAV2, ACADS, SI, ALDOB, IL6R, CPS1, AGXT, TAT, PPARGC1B, PCSK1, UGT1A6, CDKN1A, UGT1A8, HMOX1, PEBP1, CA4, HSD11B2, GHRL, CA2, SST, LCT</i> |

|                                                         |          |                                                                                                                                                                                                                                                                                                                                                              |
|---------------------------------------------------------|----------|--------------------------------------------------------------------------------------------------------------------------------------------------------------------------------------------------------------------------------------------------------------------------------------------------------------------------------------------------------------|
| Positive regulation of multicellular organismal process | 9.13E-03 | <i>MAVS, PRKCZ, EDN3, GRIK1, KL, TRPV1, EDN2, EPHX2, TLR3, ATP1A1, IL6R, CPS1, ADA, CARD11, GHRH, HMOX1, GATA4, ADRA1B, APOH, GHRL, SLC22A5, CA2, LGI1, NRG1, CASP1</i>                                                                                                                                                                                      |
| Vitamin A metabolic process                             | 9.55E-03 | <i>ALDH8A1, LRAT, CYP1A1, ADH4, RBP2, RETSAT</i>                                                                                                                                                                                                                                                                                                             |
| Negative regulation of lipid transport                  | 9.55E-03 | <i>ABCG8, ABCG5, APOC3, APOC2, NR1H3</i>                                                                                                                                                                                                                                                                                                                     |
| Carbohydrate biosynthetic process                       | 9.77E-03 | <i>B3GNT8, GPD1, G6PC, GCNT2, ST8SIA6, CHST6, ALDOB, FBP1, CHST13, PGAM2, GPT, PCK2, PPARGC1A, PCK1</i>                                                                                                                                                                                                                                                      |
| Stem cell differentiation                               | 9.79E-03 | <i>XRCC5, ACE, CDX2, PLA2G2A, PIWIL2, LIN28A, KLF4</i>                                                                                                                                                                                                                                                                                                       |
| Glycoside catabolic process                             | 9.92E-03 | <i>GBA3, GBA2, TREH</i>                                                                                                                                                                                                                                                                                                                                      |
| Generation of a signal involved in cell-cell signaling  | 1.07E-02 | <i>EDN3, HNF1A, DGAT1, TBX3, BAIAP3, GHRH, FAM3B, NEUROD1, GHRL, PDX1, FKBP1B, SMPD3</i>                                                                                                                                                                                                                                                                     |
| Steroid biosynthetic process                            | 1.07E-02 | <i>HSD17B11, ACAA2, APOA1, HNF1A, HSD17B2, HMGCS2, PIWIL2, HSD11B2, NPC1L1, SCARB1, HSD17B3, SCP2</i>                                                                                                                                                                                                                                                        |
| Phospholipid transport                                  | 1.14E-02 | <i>APOA4, ABCG8, APOA1, APOC3, ATP10A, APOC2, ABCA4</i>                                                                                                                                                                                                                                                                                                      |
| Peptide metabolic process                               | 1.15E-02 | <i>GSR, PCSK1, CTH, ACE, ADAMTS13, GPX3, MME, GGT1, PCSK5</i>                                                                                                                                                                                                                                                                                                |
| Cell-cell signaling                                     | 1.16E-02 | <i>EDN3, HNF1A, GRIK1, GABRB2, FAM3B, SLC6A4, ENPEP, PDX1, VIPR1, WNT3, GRIN2B, GATA4, HTR1D, SLC1A1, GABRG1, BAIAP3, GRIN2A, IL26, NRXN1, SSTR2, DGAT1, GHRH, SSTR1, ABAT, PEBP1, GHRL, CAV2, DRD4, MME, CCL8, AKAP9, FKBP1B, PCSK1, PCSK5, GCHFR, MLN, BMP3, TRHDE, TBX3, CPNE6, MAOA, CCL15, CXCL14, SLC6A5, ADRA1B, MTNR1B, NEUROD1, SST, SMPD3, IL2</i> |
| Response to ethanol                                     | 1.19E-02 | <i>UGT1A6, APOBEC1, UGT1A8, GRIN2B, DRD4, GRIN2A, ADH6, ABAT, PEBP1, IL6R, LCT</i>                                                                                                                                                                                                                                                                           |
| Water transport                                         | 1.22E-02 | <i>MIP, AQP11, AQP7, PDZD3, AQP3</i>                                                                                                                                                                                                                                                                                                                         |

|                                                |          |                                                                                                                                                                                                                                                        |
|------------------------------------------------|----------|--------------------------------------------------------------------------------------------------------------------------------------------------------------------------------------------------------------------------------------------------------|
| Monovalent inorganic cation transport          | 1.23E-02 | <i>KCNJ16, SLC36A1, SLC5A4, SLC20A2, SLC5A1, KCNA3, KCNJ3, KCNK10, KCNJ13, SLC23A1, KCNK5, SLC22A4, SLC4A7, SLC22A5, HCN4, SLC4A4, SGK1, ATP1A4, ATP1A1, SLC10A2, CNGA1, KCNJ6, CATSPER3, SLC17A4, KCNH6, SLC13A2, KCTD16, ABCC8, SLC5A11, SLC5A12</i> |
| Positive regulation of lipid storage           | 1.30E-02 | <i>APOB, MSRI, CD36, SCARB1</i>                                                                                                                                                                                                                        |
| Response to food                               | 1.30E-02 | <i>G6PC, CYP1A1, GHRH, HSD11B2</i>                                                                                                                                                                                                                     |
| Positive regulation of behavior                | 1.32E-02 | <i>EDN3, GHRH, EDN2, F2RL1, GHRL, IL6R, SCG2</i>                                                                                                                                                                                                       |
| Diol metabolic process                         | 1.32E-02 | <i>DDC, MAOA, DRD4, GRIN2A, SULT1A2, SULT1A4, GCHI</i>                                                                                                                                                                                                 |
| Catechol metabolic process                     | 1.32E-02 | <i>DDC, MAOA, DRD4, GRIN2A, SULT1A2, SULT1A4, GCHI</i>                                                                                                                                                                                                 |
| Catecholamine metabolic process                | 1.32E-02 | <i>DDC, MAOA, DRD4, GRIN2A, SULT1A2, SULT1A4, GCHI</i>                                                                                                                                                                                                 |
| Dicarboxylic acid metabolic process            | 1.32E-02 | <i>SDHA, ME1, SUCLG1, HAAO, QPRT, IDH3A, PCK1</i>                                                                                                                                                                                                      |
| Isoprenoid metabolic process                   | 1.34E-02 | <i>ALDH8A1, LRAT, CYP1A1, HMGCS2, ADH4, RBP2, PDSSI, RETSAT</i>                                                                                                                                                                                        |
| Regulation of foam cell differentiation        | 1.37E-02 | <i>PPARA, APOB, MSRI, CD36, PLA2G2A, NRIH3</i>                                                                                                                                                                                                         |
| Protein oligomerization                        | 1.37E-02 | <i>SHMT1, PRKCZ, CAV2, CRYAA, OTC, ALDOC, DECR1, PDSSI, GCHI, CTH, P2RX6, AQP11, GPX3, PEBP1, QPRT, CAT, SCARA5, SLC1A1, GCHFR</i>                                                                                                                     |
| Regulation of heart contraction                | 1.42E-02 | <i>EDN3, CYP2J2, EDN2, ADRA1B, PEBP1, MYH7, ATP1A1, HCN4, FKBP1B, ADA, IL2</i>                                                                                                                                                                         |
| Heterocycle catabolic process                  | 1.42E-02 | <i>ALDH6A1, UGT1A6, UGT1A8, CYP1A1, HMOX1, PRODH2, MYH7, DPYD, ADA, PRODH, GCHI, ABCC6</i>                                                                                                                                                             |
| Regulation of hormone secretion                | 1.45E-02 | <i>GCG, EDN3, HNF1A, GHRH, PFKFB2, EDN2, SIRT4, NEUROD1, GHRL, ACVR1C</i>                                                                                                                                                                              |
| Regulation of systemic arterial blood pressure | 1.51E-02 | <i>EDN3, ACE, EDN2, ADRA1B, ACE2, HSD11B2, PCSK5</i>                                                                                                                                                                                                   |

|                                             |          |                                                                                                                                                                                                                                                                        |
|---------------------------------------------|----------|------------------------------------------------------------------------------------------------------------------------------------------------------------------------------------------------------------------------------------------------------------------------|
| Fluid transport                             | 1.52E-02 | <i>MIP, AQP11, AQP7, PDZD3, AQP3</i>                                                                                                                                                                                                                                   |
| Response to zinc ion                        | 1.52E-02 | <i>KHK, APOBEC1, ALDOB, HAAO, CA2</i>                                                                                                                                                                                                                                  |
| Cellular chemical homeostasis               | 1.56E-02 | <i>CALCR, PRKCZ, JPH4, CCK, GRIK1, GRIK3, GNA11, EDN2, F2RL1, DRD4, NR3C2, FKBP1B, VDR, BAK1, GRIN2B, AQP11, RGN, CHRNA7, CHRFAM7A, SLC39A4, MT1H, GAL3ST1, GRIN2A, EPHX2, ATP1A4, SLC9A3R1, AFG3L2, CCL15, PPARGC1A, CCR9, GHRH, GHRL, SCARA5, MON1A, IL2</i>         |
| Nitrogen compound catabolic process         | 1.59E-02 | <i>ALDH6A1, UGT1A6, UGT1A8, HMOX1, ENPP3, MYH7, DPYD, ADA, MPST, GCH1, ABCC6</i>                                                                                                                                                                                       |
| Ion homeostasis                             | 1.61E-02 | <i>CALCR, PRKCZ, JPH4, CCK, GRIK1, GRIK3, GNA11, EDN2, DRD4, F2RL1, NR3C2, FKBP1B, VDR, BAK1, GRIN2B, AQP11, HMOX1, RGN, CHRNA7, CHRFAM7A, SLC39A4, MT1H, GAL3ST1, OTC, GRIN2A, EPHX2, ATP1A4, CPS1, SLC9A3R1, AFG3L2, CCL15, CCR9, GHRH, GHRL, SCARA5, MON1A, IL2</i> |
| Secondary metabolic process                 | 1.68E-02 | <i>ME1, ALDH8A1, GPD1, LRAT, CYP1A1, ADH4, ALDOB, HAAO, QPRT, IDH3A, RETSAT</i>                                                                                                                                                                                        |
| Regulation of peptide secretion             | 1.69E-02 | <i>GCG, HNF1A, GHRH, PFKFB2, SIRT4, NEUROD1, GHRL, ACVR1C</i>                                                                                                                                                                                                          |
| Regulation of behavior                      | 1.69E-02 | <i>EDN3, GHRH, EDN2, F2RL1, GHRL, IL6R, ADA, SCG2</i>                                                                                                                                                                                                                  |
| Positive regulation of leukocyte chemotaxis | 1.77E-02 | <i>EDN3, EDN2, F2RL1, IL6R</i>                                                                                                                                                                                                                                         |
| Positive regulation of heart rate           | 1.77E-02 | <i>EDN3, EDN2, ADRA1B, ADA</i>                                                                                                                                                                                                                                         |
| Phospholipid efflux                         | 1.77E-02 | <i>APOA4, APOA1, APOC3, APOC2</i>                                                                                                                                                                                                                                      |
| Acid secretion                              | 1.86E-02 | <i>ACE, DRD4, PLA2G1B, GHRL, AGXT</i>                                                                                                                                                                                                                                  |
| Insulin secretion                           | 1.89E-02 | <i>HNF1A, DGAT1, FAM3B, NEUROD1, PDX1, FKBP1B</i>                                                                                                                                                                                                                      |
| Cellular carbohydrate biosynthetic process  | 1.90E-02 | <i>B3GNT8, GPD1, G6PC, ALDOB, FBP1, PGAM2, GPT, PCK2, PPARGC1A, PCK1</i>                                                                                                                                                                                               |

|                                                        |          |                                                                                                                                                                                                                                                      |
|--------------------------------------------------------|----------|------------------------------------------------------------------------------------------------------------------------------------------------------------------------------------------------------------------------------------------------------|
| Glycoside<br>metabolic process                         | 1.91E-02 | <i>GBA3, GBA2, TREH</i>                                                                                                                                                                                                                              |
| Plasminogen<br>activation                              | 1.91E-02 | <i>F11, KLKB1, APOH</i>                                                                                                                                                                                                                              |
| Secretion by cell                                      | 1.95E-02 | <i>EDN3, HNF1A, TBX3, BAIAP3, FAM3B, CCL8, PDX1, FKBP1B, STXBP5L, TRIM36, DGAT1, GHRH, SCIN, GHRL, NEUROD1, DOC2B, PCSK5, SMPD3, MON1A, SCG2, SCAMP5</i>                                                                                             |
| Calcium ion<br>transport                               | 1.95E-02 | <i>ORAI1, JPH4, TRPM6, CLCA1, TRPV1, GRIN2A, CCL8, FKBP1B, VDR, TMEM37, CATSPER2, GRIN2B, CATSPER3, CHRNA7, TRPV6, CHRFAM7A, CAMK2A</i>                                                                                                              |
| Cellular ion<br>homeostasis                            | 2.10E-02 | <i>CALCR, JPH4, PRKCZ, CCK, GRIK1, GRIK3, GNA11, EDN2, F2RL1, DRD4, NR3C2, FKBP1B, VDR, BAK1, GRIN2B, AQP11, RGN, CHRNA7, CHRFAM7A, SLC39A4, MT1H, GAL3ST1, GRIN2A, EPHX2, ATP1A4, SLC9A3R1, AFG3L2, CCL15, CCR9, GHRH, GHRL, SCARA5, MON1A, IL2</i> |
| Regulation of<br>fatty acid<br>oxidation               | 2.19E-02 | <i>SLC25A20, PPARA, CPT2, FABP1, STRADB, PPARGC1A</i>                                                                                                                                                                                                |
| Vitamin<br>biosynthetic<br>process                     | 2.19E-02 | <i>ME1, TPK1, ALDH8A1, CYP1A1, HAAO, QPRT</i>                                                                                                                                                                                                        |
| Prostaglandin<br>metabolic process                     | 2.25E-02 | <i>AKR1C3, CYP4F8, ACOX1, EDN2, HPGD</i>                                                                                                                                                                                                             |
| Prostanoid<br>metabolic process                        | 2.25E-02 | <i>AKR1C3, CYP4F8, ACOX1, EDN2, HPGD</i>                                                                                                                                                                                                             |
| Serine family<br>amino acid<br>biosynthetic<br>process | 2.33E-02 | <i>SHMT1, CTH, SEPHS2, AGXT</i>                                                                                                                                                                                                                      |
| Sphingomyelin<br>metabolic process                     | 2.33E-02 | <i>ENPP7, SMPDL3B, SMPDL3A, SMPD3</i>                                                                                                                                                                                                                |
| Regulation of<br>leukocyte<br>chemotaxis               | 2.33E-02 | <i>EDN3, EDN2, F2RL1, IL6R</i>                                                                                                                                                                                                                       |
| Protein<br>tetramerization                             | 2.49E-02 | <i>SHMT1, CTH, ALDOC, GPX3, DECRI, CAT, PDSSI</i>                                                                                                                                                                                                    |



|                                                                |          |                                                                                                                                                           |
|----------------------------------------------------------------|----------|-----------------------------------------------------------------------------------------------------------------------------------------------------------|
| Response to organic cyclic substance                           | 2.51E-02 | <i>CYP11A1, ALDOC, DRD4, TAT, GNAT3, PCSK1, CDKN1A, PLIN2, CDKN2B, HMOX1, ADRA1B, PEBP1, ABAT, CHRNA7, CHRFAM7A</i>                                       |
| Sulfur compound biosynthetic process                           | 2.58E-02 | <i>TPK1, ADI1, CTH, SEPHS2, CHST6, BHMT, CHST13, GGT1</i>                                                                                                 |
| Carbohydrate catabolic process                                 | 2.60E-02 | <i>GPD1, ALDOC, HKDC1, PFKFB2, ALDOB, PGAM2, CPS1, GBA3, GBA2, G6PC, PKLR, MGAM, TREH</i>                                                                 |
| Positive regulation of secretion                               | 2.60E-02 | <i>EDN3, PCSK1, GRIN2B, GRIK1, GHRH, PFKFB2, EDN2, SCIN, PLA2G1B, GHRL, CASP1, IL2, SCAMP5</i>                                                            |
| Organophosphate metabolic process                              | 2.61E-02 | <i>GPD1, PLD1, ENPP7, GALT, PIP5K1B, CDS1, LPCAT3, APOA4, PLCB3, APOA1, PIP5KL1, SMPDL3B, SEMA6D, SMPDL3A, AGPAT9, PLA2G2A, PLA2G1B, GK, PCYT2, SMPD3</i> |
| Regulation of vasodilation                                     | 2.69E-02 | <i>ACE, HMOX1, ACE2, EPHX2, CPS1</i>                                                                                                                      |
| Regulation of insulin secretion                                | 2.79E-02 | <i>GCG, HNF1A, PFKFB2, SIRT4, NEUROD1, GHRL, ACVR1C</i>                                                                                                   |
| Di-, tri-valent inorganic cation transport                     | 2.97E-02 | <i>ORAI1, SLC39A14, JPH4, TRPM6, CLCA1, TRPV1, GRIN2A, CCL8, FKBP1B, TMEM37, VDR, CATSPER2, GRIN2B, CATSPER3, CHRNA7, TRPV6, CHRFAM7A, SCARA5, CAMK2A</i> |
| High-density lipoprotein particle remodeling                   | 2.98E-02 | <i>APOA4, APOC3, SCARB1, APOM</i>                                                                                                                         |
| Regulation of very-low-density lipoprotein particle remodeling | 3.06E-02 | <i>APOA1, APOC3, APOC2</i>                                                                                                                                |
| Sphingomyelin catabolic process                                | 3.06E-02 | <i>SMPDL3B, SMPDL3A, SMPD3</i>                                                                                                                            |
| Oxidoreduction coenzyme metabolic process                      | 3.13E-02 | <i>ME1, COQ4, GPD1, ALDOB, HAAO, QPRT, PDSS1, IDH3A</i>                                                                                                   |
| Cofactor catabolic process                                     | 3.28E-02 | <i>SDHA, UGT1A6, UGT1A8, ACO2, HMOX1, SUCLG1, IDH3A</i>                                                                                                   |

|                                                  |          |                                                                                                                                                                                                                                                                                        |
|--------------------------------------------------|----------|----------------------------------------------------------------------------------------------------------------------------------------------------------------------------------------------------------------------------------------------------------------------------------------|
| Response to starvation                           | 3.46E-02 | <i>UGT1A6, UGT1A8, ACADS, ALDOB, SI, CPS1, PPARGC1A, LCT</i>                                                                                                                                                                                                                           |
| Phospholipid catabolic process                   | 3.70E-02 | <i>PLCB3, PLD1, SMPDL3B, SMPDL3A, SMPD3</i>                                                                                                                                                                                                                                            |
| Nitric oxide metabolic process                   | 3.70E-02 | <i>ARG2, CPS1, GCHFR, GCHI</i>                                                                                                                                                                                                                                                         |
| Positive regulation of foam cell differentiation | 3.70E-02 | <i>APOB, MSRI, CD36, PLA2G2A</i>                                                                                                                                                                                                                                                       |
| Positive regulation of lipid catabolic process   | 3.70E-02 | <i>APOA4, PPARA, APOC2, FABP1</i>                                                                                                                                                                                                                                                      |
| Drug transport                                   | 3.70E-02 | <i>SLC22A18, SLC22A5, PDZK1, SLC47A2</i>                                                                                                                                                                                                                                               |
| Regulation of body fluid levels                  | 3.74E-02 | <i>F11, F10, ADAMTS13, F2RL1, MST1, F13B, SCT, CD36, HNF4A, KLKB1, PROZ, SLC22A4, APOH, HSD11B2, GUCA2B</i>                                                                                                                                                                            |
| Response to oxygen levels                        | 3.74E-02 | <i>PPARA, CYP1A1, PDIA2, ALDOC, ADA, ACE, CDKN1A, HMOX1, ABAT, HSD11B2, CHRNA7, CHRFAM7A, CASP1, LCT, DPP4, MB</i>                                                                                                                                                                     |
| Cellular homeostasis                             | 3.77E-02 | <i>CALCR, PRKCZ, JPH4, CCK, GRIK1, PDIA2, GRIK3, GNA11, EDN2, DRD4, F2RL1, NR3C2, FKBP1B, GSR, VDR, BAK1, GRIN2B, AQP11, HAAO, RGN, CHRNA7, CHRFAM7A, SLC39A4, MT1H, GAL3ST1, GLRX, GRIN2A, EPHX2, ATP1A4, SLC9A3R1, AFG3L2, CCL15, PPARGC1A, CCR9, GHRH, GHRL, SCARA5, MON1A, IL2</i> |
| Amine catabolic process                          | 3.85E-02 | <i>ALDH6A1, SHMT1, ASPA, MAOA, AMT, GLS, PRODH2, TAT, DDO, PRODH</i>                                                                                                                                                                                                                   |
| Diterpenoid metabolic process                    | 4.28E-02 | <i>ALDH8A1, LRAT, CYP1A1, ADH4, RETSAT</i>                                                                                                                                                                                                                                             |
| Retinoid metabolic process                       | 4.28E-02 | <i>ALDH8A1, LRAT, CYP1A1, ADH4, RETSAT</i>                                                                                                                                                                                                                                             |
| Nucleobase metabolic process                     | 4.28E-02 | <i>ALDH6A1, SHMT1, DPYD, ADA, AMPD1</i>                                                                                                                                                                                                                                                |
| Sulfur amino acid metabolic process              | 4.28E-02 | <i>ADII, MSRA, CTH, SEPHS2, BHMT</i>                                                                                                                                                                                                                                                   |
| Regulation of postsynaptic                       | 4.28E-02 | <i>GRIN2B, GRIK1, DRD4, GRIN2A, GHRL</i>                                                                                                                                                                                                                                               |

|                                                      |          |                                                                                                                                                                          |
|------------------------------------------------------|----------|--------------------------------------------------------------------------------------------------------------------------------------------------------------------------|
| membrane potential                                   |          |                                                                                                                                                                          |
| Cellular cation homeostasis                          | 4.38E-02 | <i>CALCR, JPH4, EDN2, F2RL1, DRD4, EPHX2, NR3C2, ATP1A4, CCL15, FKBP1B, CCR9, BAK1, VDR, AQP11, GHRH, RGN, GHRL, CHRNA7, CHRFAM7A, SLC39A4, MT1H, SCARA5, IL2, MON1A</i> |
| Regulation of triglyceride catabolic process         | 4.41E-02 | <i>APOA4, APOC3, APOC2</i>                                                                                                                                               |
| Negative regulation of lipoprotein metabolic process | 4.41E-02 | <i>APOA4, APOM, HHATL</i>                                                                                                                                                |
| Cellular amino acid catabolic process                | 4.49E-02 | <i>ALDH6A1, SHMT1, ASPA, AMT, GLS, PRODH2, TAT, DDO, PRODH</i>                                                                                                           |
| Nitric oxide mediated signal transduction            | 4.51E-02 | <i>CD36, NEUROD1, PDX1, MT1H</i>                                                                                                                                         |
| Purine base metabolic process                        | 4.51E-02 | <i>SHMT1, DPYD, ADA, AMPD1</i>                                                                                                                                           |
| Circulatory system process                           | 4.64E-02 | <i>EDN3, CAV2, PPARA, EDN2, EPHX2, ATP1A1, GCHI, ACE, CHGA, NTS, HMOX1, ADRA1B, ACE2, ABAT, HSD11B2, GUCA2B, HCN4, PCSK5</i>                                             |
| Blood circulation                                    | 4.64E-02 | <i>EDN3, CAV2, PPARA, EDN2, EPHX2, ATP1A1, GCHI, ACE, CHGA, NTS, HMOX1, ADRA1B, ACE2, ABAT, HSD11B2, GUCA2B, HCN4, PCSK5</i>                                             |
| Negative regulation of phosphorylation               | 4.64E-02 | <i>BAK1, PRKCZ, CDKN1A, HNF4A, CDKN2B, PEBP1, IL2</i>                                                                                                                    |
| Regulation of response to external stimulus          | 4.69E-02 | <i>F11, EDN3, PPARA, CCK, EDN2, F2RL1, IL6R, ADA, KLKB1, ACE2, PLA2G2A, APOH, GHRL, CHRNA7, CHRFAM7A, IL2, SCG2</i>                                                      |
| Nucleoside triphosphate catabolic process            | 4.90E-02 | <i>ENPP3, MYH7, ADA, GCHI, ABCC6</i>                                                                                                                                     |

|                                                     |          |                                                                                                                                         |
|-----------------------------------------------------|----------|-----------------------------------------------------------------------------------------------------------------------------------------|
| Aspartate family<br>amino acid<br>metabolic process | 4.90E-02 | <i>ADII, MSRA, ASPA, BHMT, DDO</i>                                                                                                      |
| Brown fat cell<br>differentiation                   | 4.90E-02 | <i>PEX11A, ALDH6A1, PRDM16, PPARGC1A, MB</i>                                                                                            |
| Visual perception                                   | 5.09E-02 | <i>GJA10, CLRN1, CRYAA, KRT12, CYP4V2, CDS1, ABCA4, PHYH, CNGA1, RDH5, SFRP5, MIP, CRYGC, LRAT, NRL, CA4, USH1C, ACAD11, OAT, ABCC6</i> |
| Sensory<br>perception of light<br>stimulus          | 5.09E-02 | <i>GJA10, CLRN1, CRYAA, KRT12, CYP4V2, CDS1, ABCA4, PHYH, CNGA1, RDH5, SFRP5, MIP, CRYGC, LRAT, NRL, CA4, USH1C, ACAD11, OAT, ABCC6</i> |

---

**Supplementary Table 4.** Connectivity Map analysis of differentially expressed genes (DEGs) from ampullary cancer microarray. Chemicals with a negative correlation with DEGs of ampullary cancer are those with higher potential of cytotoxic ability.

| Rank | CMap name                   | Dose       | Cell | Score | Up     | Down   | Instance id |
|------|-----------------------------|------------|------|-------|--------|--------|-------------|
| 5489 | fludrocortisone             | 9 $\mu$ M  | HL60 | 0     | -0.19  | -0.234 | 2368        |
| 5490 | SB-202190                   | 1 $\mu$ M  | PC3  | 0     | -0.19  | -0.14  | 7058        |
| 5491 | tocainide                   | 17 $\mu$ M | MCF7 | 0     | -0.19  | -0.195 | 4838        |
| 5492 | diclofenamide               | 13 $\mu$ M | MCF7 | 0     | -0.19  | -0.225 | 5286        |
| 5493 | tribenoside                 | 8 $\mu$ M  | HL60 | 0     | -0.19  | -0.159 | 2946        |
| 5494 | (-)-isoprenaline            | 16 $\mu$ M | PC3  | 0     | -0.19  | -0.093 | 4495        |
| 5495 | harman                      | 18 $\mu$ M | HL60 | 0     | -0.191 | -0.22  | 2150        |
| 5496 | phentolamine                | 12 $\mu$ M | MCF7 | 0     | -0.191 | -0.207 | 1138        |
| 5497 | rosiglitazone               | 10 $\mu$ M | MCF7 | 0     | -0.191 | -0.235 | 6950        |
| 5498 | rilmenidine                 | 8 $\mu$ M  | PC3  | 0     | -0.191 | -0.129 | 5107        |
| 5499 | bacampicillin               | 8 $\mu$ M  | MCF7 | 0     | -0.191 | -0.238 | 3273        |
| 5500 | hydroflumethiazide          | 12 $\mu$ M | PC3  | 0     | -0.191 | -0.139 | 1809        |
| 5501 | lobeline                    | 11 $\mu$ M | MCF7 | 0     | -0.191 | -0.161 | 6258        |
| 5502 | megestrol                   | 10 $\mu$ M | HL60 | 0     | -0.191 | -0.206 | 3091        |
| 5503 | iocetamic acid              | 7 $\mu$ M  | PC3  | 0     | -0.191 | -0.169 | 4600        |
| 5504 | isoxicam                    | 12 $\mu$ M | PC3  | 0     | -0.191 | -0.147 | 7268        |
| 5505 | haloperidol                 | 10 $\mu$ M | PC3  | 0     | -0.191 | -0.119 | 1244        |
| 5506 | dihydroergocristine         | 6 $\mu$ M  | MCF7 | 0     | -0.191 | -0.195 | 7034        |
| 5507 | AG-013608                   | 10 $\mu$ M | PC3  | 0     | -0.191 | -0.113 | 6440        |
| 5508 | acemetacin                  | 10 $\mu$ M | HL60 | 0     | -0.192 | -0.207 | 2411        |
| 5509 | mefexamide                  | 13 $\mu$ M | PC3  | 0     | -0.192 | -0.118 | 2121        |
| 5510 | ramifenazone                | 14 $\mu$ M | HL60 | 0     | -0.192 | -0.209 | 2534        |
| 5511 | strophanthidin              | 10 $\mu$ M | MCF7 | 0     | -0.192 | -0.163 | 7182        |
| 5512 | nicardipine                 | 8 $\mu$ M  | HL60 | 0     | -0.192 | -0.18  | 1600        |
| 5513 | clofazimine                 | 8 $\mu$ M  | PC3  | 0     | -0.192 | -0.145 | 4682        |
| 5514 | fenofibrate                 | 11 $\mu$ M | MCF7 | 0     | -0.192 | -0.2   | 7432        |
| 5515 | quipazine                   | 9 $\mu$ M  | MCF7 | 0     | -0.193 | -0.23  | 2782        |
| 5516 | pizotifen                   | 9 $\mu$ M  | HL60 | 0     | -0.193 | -0.167 | 3134        |
| 5517 | rilmenidine                 | 8 $\mu$ M  | HL60 | 0     | -0.193 | -0.2   | 3133        |
| 5518 | tetracycline                | 8 $\mu$ M  | MCF7 | 0     | -0.193 | -0.209 | 6233        |
| 5519 | haloperidol                 | 10 $\mu$ M | MCF7 | 0     | -0.193 | -0.22  | 6960        |
| 5520 | merbromin                   | 5 $\mu$ M  | MCF7 | 0     | -0.193 | -0.213 | 3439        |
| 5521 | carisoprodol                | 15 $\mu$ M | HL60 | 0     | -0.193 | -0.215 | 1314        |
| 5522 | benzathine benzylpenicillin | 4 $\mu$ M  | MCF7 | 0     | -0.193 | -0.209 | 7359        |

|      |                          |            |      |   |        |        |      |
|------|--------------------------|------------|------|---|--------|--------|------|
| 5523 | octopamine               | 21 $\mu$ M | HL60 | 0 | -0.193 | -0.119 | 3112 |
| 5524 | haloperidol              | 10 $\mu$ M | MCF7 | 0 | -0.194 | -0.175 | 1024 |
| 5525 | vanoxerine               | 8 $\mu$ M  | PC3  | 0 | -0.194 | -0.098 | 4641 |
| 5526 | estradiol                | 10 nM      | MCF7 | 0 | -0.194 | -0.206 | 6957 |
| 5527 | pilocarpine              | 15 $\mu$ M | MCF7 | 0 | -0.194 | -0.172 | 5341 |
| 5528 | vigabatrin               | 31 $\mu$ M | HL60 | 0 | -0.194 | -0.19  | 2452 |
| 5529 | ergocalciferol           | 10 $\mu$ M | MCF7 | 0 | -0.194 | -0.177 | 5346 |
| 5530 | hexylcaine               | 13 $\mu$ M | HL60 | 0 | -0.195 | -0.169 | 2708 |
| 5531 | tinidazole               | 16 $\mu$ M | MCF7 | 0 | -0.195 | -0.209 | 3896 |
| 5532 | fluoxetine               | 12 $\mu$ M | HL60 | 0 | -0.195 | -0.191 | 2453 |
| 5533 | PHA-00745360             | 1 $\mu$ M  | PC3  | 0 | -0.195 | -0.159 | 4562 |
| 5534 | tiaprofenic acid         | 15 $\mu$ M | MCF7 | 0 | -0.195 | -0.219 | 2852 |
| 5535 | mebeverine               | 9 $\mu$ M  | PC3  | 0 | -0.195 | -0.118 | 7147 |
| 5536 | sulfadimethoxine         | 13 $\mu$ M | MCF7 | 0 | -0.195 | -0.204 | 4724 |
| 5537 | adiphenine               | 11 $\mu$ M | MCF7 | 0 | -0.195 | -0.208 | 7037 |
| 5538 | thapsigargin             | 100 nM     | PC3  | 0 | -0.195 | -0.146 | 7103 |
| 5539 | guanabenz                | 14 $\mu$ M | PC3  | 0 | -0.195 | -0.14  | 4642 |
| 5540 | genistein                | 10 $\mu$ M | HL60 | 0 | -0.195 | -0.207 | 1176 |
| 5541 | isometheptene            | 8 $\mu$ M  | HL60 | 0 | -0.195 | -0.198 | 3145 |
| 5542 | 3-hydroxy-DL-kynurenine  | 18 $\mu$ M | HL60 | 0 | -0.195 | -0.225 | 1300 |
| 5543 | methanethelinium bromide | 10 $\mu$ M | HL60 | 0 | -0.195 | -0.197 | 6137 |
| 5544 | eticlopride              | 11 $\mu$ M | HL60 | 0 | -0.195 | -0.156 | 3056 |
| 5545 | telenzepine              | 9 $\mu$ M  | MCF7 | 0 | -0.196 | -0.194 | 7419 |
| 5546 | merbromin                | 5 $\mu$ M  | PC3  | 0 | -0.196 | -0.071 | 3700 |
| 5547 | alprostadil              | 10 $\mu$ M | MCF7 | 0 | -0.196 | -0.205 | 6576 |
| 5548 | lisuride                 | 12 $\mu$ M | MCF7 | 0 | -0.196 | -0.206 | 1545 |
| 5549 | genistein                | 10 $\mu$ M | MCF7 | 0 | -0.196 | -0.207 | 6952 |
| 5550 | co-dergocrine mesilate   | 6 $\mu$ M  | MCF7 | 0 | -0.196 | -0.193 | 2793 |
| 5551 | prazosin                 | 10 $\mu$ M | PC3  | 0 | -0.196 | -0.115 | 6315 |
| 5552 | thiamphenicol            | 11 $\mu$ M | PC3  | 0 | -0.196 | -0.112 | 7274 |
| 5553 | convolamine              | 12 $\mu$ M | MCF7 | 0 | -0.196 | -0.23  | 2771 |
| 5554 | lactobionic acid         | 11 $\mu$ M | HL60 | 0 | -0.196 | -0.193 | 1309 |
| 5555 | meteneprost              | 10 $\mu$ M | PC3  | 0 | -0.197 | -0.139 | 7504 |
| 5556 | pirenperone              | 10 $\mu$ M | PC3  | 0 | -0.197 | -0.121 | 4679 |
| 5557 | tretinoin                | 1 $\mu$ M  | MCF7 | 0 | -0.197 | -0.239 | 849  |
| 5558 | carteolol                | 12 $\mu$ M | MCF7 | 0 | -0.197 | -0.203 | 3276 |
| 5559 | terconazole              | 8 $\mu$ M  | PC3  | 0 | -0.197 | -0.133 | 4583 |
| 5560 | disopyramide             | 12 $\mu$ M | PC3  | 0 | -0.197 | -0.141 | 7276 |

|      |                       |             |      |   |        |        |      |
|------|-----------------------|-------------|------|---|--------|--------|------|
| 5561 | stachydrine           | 22 $\mu$ M  | MCF7 | 0 | -0.198 | -0.218 | 2743 |
| 5562 | acemetacin            | 10 $\mu$ M  | MCF7 | 0 | -0.198 | -0.243 | 7442 |
| 5563 | carbarsone            | 15 $\mu$ M  | HL60 | 0 | -0.198 | -0.238 | 1313 |
| 5564 | estradiol             | 10 nM       | MCF7 | 0 | -0.198 | -0.199 | 7000 |
| 5565 | amitriptyline         | 13 $\mu$ M  | PC3  | 0 | -0.198 | -0.099 | 1823 |
| 5566 | terazosin             | 9 $\mu$ M   | MCF7 | 0 | -0.198 | -0.181 | 7187 |
| 5567 | valproic acid         | 500 $\mu$ M | MCF7 | 0 | -0.198 | -0.168 | 6999 |
| 5568 | estradiol             | 10 nM       | HL60 | 0 | -0.198 | -0.173 | 1182 |
| 5569 | moracizine            | 9 $\mu$ M   | MCF7 | 0 | -0.198 | -0.111 | 6000 |
| 5570 | atracurium besilate   | 3 $\mu$ M   | PC3  | 0 | -0.198 | -0.116 | 1824 |
| 5571 | chlorpropamide        | 100 $\mu$ M | MCF7 | 0 | -0.198 | -0.166 | 144  |
| 5572 | alexidine             | 7 $\mu$ M   | HL60 | 0 | -0.199 | -0.238 | 2576 |
| 5573 | nitrofuraf            | 20 $\mu$ M  | HL60 | 0 | -0.199 | -0.2   | 2459 |
| 5574 | Gly-His-Lys           | 1 $\mu$ M   | PC3  | 0 | -0.199 | -0.108 | 6570 |
| 5575 | tretinoin             | 1 $\mu$ M   | HL60 | 0 | -0.199 | -0.172 | 6170 |
| 5576 | ajmaline              | 12 $\mu$ M  | MCF7 | 0 | -0.199 | -0.175 | 7484 |
| 5577 | betulinic acid        | 9 $\mu$ M   | MCF7 | 0 | -0.199 | -0.196 | 3281 |
| 5578 | myricetin             | 13 $\mu$ M  | HL60 | 0 | -0.2   | -0.169 | 1334 |
| 5579 | dosulepin             | 12 $\mu$ M  | HL60 | 0 | -0.2   | -0.156 | 1713 |
| 5580 | ifosfamide            | 15 $\mu$ M  | MCF7 | 0 | -0.2   | -0.2   | 3485 |
| 5581 | alprenolol            | 14 $\mu$ M  | PC3  | 0 | -0.2   | -0.139 | 7141 |
| 5582 | iopromide             | 5 $\mu$ M   | PC3  | 0 | -0.2   | -0.126 | 4504 |
| 5583 | hexetidine            | 12 $\mu$ M  | HL60 | 0 | -0.2   | -0.209 | 2457 |
| 5584 | 5186223               | 12 $\mu$ M  | MCF7 | 0 | -0.2   | -0.233 | 885  |
| 5585 | loracarbef            | 11 $\mu$ M  | HL60 | 0 | -0.2   | -0.249 | 2970 |
| 5586 | tranexamic acid       | 25 $\mu$ M  | PC3  | 0 | -0.2   | -0.123 | 2085 |
| 5587 | chlorogenic acid      | 11 $\mu$ M  | PC3  | 0 | -0.2   | -0.141 | 4024 |
| 5588 | erythromycin          | 5 $\mu$ M   | MCF7 | 0 | -0.201 | -0.172 | 5329 |
| 5589 | streptozocin          | 15 $\mu$ M  | MCF7 | 0 | -0.201 | -0.202 | 7193 |
| 5590 | mebhydrolin           | 5 $\mu$ M   | HL60 | 0 | -0.201 | -0.207 | 1333 |
| 5591 | meclofenamic acid     | 12 $\mu$ M  | PC3  | 0 | -0.201 | -0.109 | 2128 |
| 5592 | lidocaine             | 15 $\mu$ M  | MCF7 | 0 | -0.201 | -0.194 | 4421 |
| 5593 | acetazolamide         | 18 $\mu$ M  | PC3  | 0 | -0.201 | -0.14  | 1808 |
| 5594 | levopropoxyphene      | 7 $\mu$ M   | MCF7 | 0 | -0.201 | -0.18  | 3543 |
| 5595 | fursultiamine         | 9 $\mu$ M   | MCF7 | 0 | -0.201 | -0.192 | 7349 |
| 5596 | succinylsulfathiazole | 11 $\mu$ M  | MCF7 | 0 | -0.201 | -0.185 | 2821 |
| 5597 | bethanechol           | 20 $\mu$ M  | PC3  | 0 | -0.201 | -0.108 | 5114 |
| 5598 | ceforanide            | 8 $\mu$ M   | MCF7 | 0 | -0.201 | -0.178 | 5351 |

|      |                    |             |      |   |        |        |      |
|------|--------------------|-------------|------|---|--------|--------|------|
| 5599 | hexylcaine         | 13 $\mu$ M  | MCF7 | 0 | -0.201 | -0.183 | 6244 |
| 5600 | primidone          | 18 $\mu$ M  | HL60 | 0 | -0.201 | -0.179 | 3065 |
| 5601 | trihexyphenidyl    | 12 $\mu$ M  | HL60 | 0 | -0.201 | -0.187 | 2158 |
| 5602 | 5186324            | 2 $\mu$ M   | MCF7 | 0 | -0.201 | -0.198 | 900  |
| 5603 | Prestwick-1103     | 20 $\mu$ M  | PC3  | 0 | -0.202 | -0.13  | 7317 |
| 5604 | meclocycline       | 6 $\mu$ M   | HL60 | 0 | -0.202 | -0.218 | 1341 |
| 5605 | tetryzoline        | 17 $\mu$ M  | MCF7 | 0 | -0.202 | -0.162 | 6769 |
| 5606 | khellin            | 15 $\mu$ M  | PC3  | 0 | -0.202 | -0.116 | 6641 |
| 5607 | paromomycin        | 6 $\mu$ M   | HL60 | 0 | -0.202 | -0.168 | 3017 |
| 5608 | ciclosporin        | 3 $\mu$ M   | PC3  | 0 | -0.202 | -0.145 | 4586 |
| 5609 | mimosine           | 20 $\mu$ M  | MCF7 | 0 | -0.202 | -0.216 | 5302 |
| 5610 | metoclopramide     | 12 $\mu$ M  | PC3  | 0 | -0.202 | -0.132 | 3728 |
| 5611 | haloperidol        | 10 $\mu$ M  | HL60 | 0 | -0.202 | -0.214 | 1185 |
| 5612 | chlorprothixene    | 11 $\mu$ M  | MCF7 | 0 | -0.202 | -0.234 | 5291 |
| 5613 | pepstatin          | 6 $\mu$ M   | MCF7 | 0 | -0.202 | -0.19  | 3264 |
| 5614 | Prestwick-642      | 14 $\mu$ M  | MCF7 | 0 | -0.203 | -0.213 | 2815 |
| 5615 | enoxacin           | 12 $\mu$ M  | HL60 | 0 | -0.203 | -0.22  | 1597 |
| 5616 | (+/-)-catechin     | 14 $\mu$ M  | HL60 | 0 | -0.203 | -0.169 | 3012 |
| 5617 | mefenamic acid     | 17 $\mu$ M  | HL60 | 0 | -0.203 | -0.229 | 1863 |
| 5618 | valproic acid      | 500 $\mu$ M | MCF7 | 0 | -0.203 | -0.194 | 1665 |
| 5619 | midodrine          | 14 $\mu$ M  | PC3  | 0 | -0.203 | -0.117 | 7156 |
| 5620 | tolmetin           | 13 $\mu$ M  | HL60 | 0 | -0.203 | -0.191 | 3009 |
| 5621 | meteneprost        | 10 $\mu$ M  | MCF7 | 0 | -0.203 | -0.21  | 7552 |
| 5622 | piperine           | 14 $\mu$ M  | HL60 | 0 | -0.204 | -0.187 | 1327 |
| 5623 | dyclonine          | 12 $\mu$ M  | MCF7 | 0 | -0.204 | -0.195 | 7423 |
| 5624 | CP-690334-01       | 1 $\mu$ M   | PC3  | 0 | -0.204 | -0.207 | 4561 |
| 5625 | letrozole          | 14 $\mu$ M  | MCF7 | 0 | -0.204 | -0.213 | 4824 |
| 5626 | methyl dopa        | 19 $\mu$ M  | PC3  | 0 | -0.204 | -0.133 | 4677 |
| 5627 | dicloxacillin      | 8 $\mu$ M   | MCF7 | 0 | -0.204 | -0.165 | 5012 |
| 5628 | arecoline          | 17 $\mu$ M  | PC3  | 0 | -0.205 | -0.127 | 6322 |
| 5629 | iopamidol          | 5 $\mu$ M   | MCF7 | 0 | -0.205 | -0.185 | 7189 |
| 5630 | cyclobenzaprine    | 13 $\mu$ M  | HL60 | 0 | -0.205 | -0.21  | 1332 |
| 5631 | sulfamonomethoxine | 14 $\mu$ M  | MCF7 | 0 | -0.205 | -0.213 | 7200 |
| 5632 | vinblastine        | 100 nM      | MCF7 | 0 | -0.205 | -0.2   | 7551 |
| 5633 | trimipramine       | 10 $\mu$ M  | HL60 | 0 | -0.205 | -0.172 | 3004 |
| 5634 | metampicillin      | 10 $\mu$ M  | PC3  | 0 | -0.205 | -0.104 | 2123 |
| 5635 | pergolide          | 10 $\mu$ M  | PC3  | 0 | -0.205 | -0.13  | 7271 |
| 5636 | doxycycline        | 8 $\mu$ M   | MCF7 | 0 | -0.205 | -0.203 | 7195 |



|      |                    |            |      |   |        |        |      |
|------|--------------------|------------|------|---|--------|--------|------|
| 5637 | cefoperazone       | 6 $\mu$ M  | PC3  | 0 | -0.205 | -0.104 | 6323 |
| 5638 | fulvestrant        | 1 $\mu$ M  | PC3  | 0 | -0.205 | -0.124 | 7539 |
| 5639 | Prestwick-682      | 6 $\mu$ M  | HL60 | 0 | -0.205 | -0.228 | 2164 |
| 5640 | isosorbide         | 17 $\mu$ M | PC3  | 0 | -0.206 | -0.108 | 3720 |
| 5641 | atractyloside      | 5 $\mu$ M  | HL60 | 0 | -0.206 | -0.212 | 2573 |
| 5642 | lumicolchicine     | 10 $\mu$ M | HL60 | 0 | -0.206 | -0.21  | 1317 |
| 5643 | cefotiam           | 7 $\mu$ M  | MCF7 | 0 | -0.206 | -0.198 | 5361 |
| 5644 | CP-863187          | 10 $\mu$ M | MCF7 | 0 | -0.206 | -0.232 | 7553 |
| 5645 | saquinavir         | 5 $\mu$ M  | HL60 | 0 | -0.206 | -0.159 | 6127 |
| 5646 | pentoxifylline     | 14 $\mu$ M | PC3  | 0 | -0.206 | -0.118 | 7319 |
| 5647 | estradiol          | 10 nM      | MCF7 | 0 | -0.207 | -0.222 | 1666 |
| 5648 | nystatin           | 4 $\mu$ M  | HL60 | 0 | -0.207 | -0.175 | 2500 |
| 5649 | geldanamycin       | 1 $\mu$ M  | MCF7 | 0 | -0.207 | -0.208 | 864  |
| 5650 | iohexol            | 5 $\mu$ M  | PC3  | 0 | -0.207 | -0.126 | 4643 |
| 5651 | monorden           | 100 nM     | HL60 | 0 | -0.207 | -0.18  | 2679 |
| 5652 | isotretinoin       | 13 $\mu$ M | MCF7 | 0 | -0.207 | -0.196 | 7438 |
| 5653 | alpha-ergocryptine | 7 $\mu$ M  | HL60 | 0 | -0.207 | -0.215 | 2572 |
| 5654 | prochlorperazine   | 7 $\mu$ M  | HL60 | 0 | -0.207 | -0.22  | 1286 |
| 5655 | Prestwick-692      | 7 $\mu$ M  | HL60 | 0 | -0.207 | -0.2   | 2165 |
| 5656 | penbutolol         | 6 $\mu$ M  | HL60 | 0 | -0.207 | -0.227 | 2972 |
| 5657 | rosiglitazone      | 10 $\mu$ M | MCF7 | 0 | -0.208 | -0.232 | 1071 |
| 5658 | dapsone            | 16 $\mu$ M | PC3  | 0 | -0.208 | -0.164 | 1827 |
| 5659 | primaquine         | 9 $\mu$ M  | HL60 | 0 | -0.209 | -0.187 | 1343 |
| 5660 | carbenoxolone      | 7 $\mu$ M  | HL60 | 0 | -0.209 | -0.188 | 3014 |
| 5661 | cyclopenthiiazide  | 11 $\mu$ M | HL60 | 0 | -0.209 | -0.23  | 2905 |
| 5662 | ketotifen          | 9 $\mu$ M  | MCF7 | 0 | -0.209 | -0.186 | 7199 |
| 5663 | brinzolamide       | 10 $\mu$ M | MCF7 | 0 | -0.209 | -0.219 | 5016 |
| 5664 | azacyclonol        | 15 $\mu$ M | MCF7 | 0 | -0.209 | -0.188 | 1520 |
| 5665 | minocycline        | 11 $\mu$ M | MCF7 | 0 | -0.209 | -0.195 | 1135 |
| 5666 | noscapine          | 10 $\mu$ M | MCF7 | 0 | -0.21  | -0.201 | 2745 |
| 5667 | hydroxyachillin    | 14 $\mu$ M | HL60 | 0 | -0.21  | -0.244 | 2157 |
| 5668 | genistein          | 10 $\mu$ M | MCF7 | 0 | -0.21  | -0.209 | 1660 |
| 5669 | calycanthine       | 12 $\mu$ M | MCF7 | 0 | -0.21  | -0.195 | 6221 |
| 5670 | androsterone       | 14 $\mu$ M | PC3  | 0 | -0.211 | -0.093 | 4635 |
| 5671 | cefotaxime         | 8 $\mu$ M  | MCF7 | 0 | -0.211 | -0.185 | 7186 |
| 5672 | vitexin            | 9 $\mu$ M  | HL60 | 0 | -0.211 | -0.223 | 2155 |
| 5673 | methyl dopate      | 15 $\mu$ M | MCF7 | 0 | -0.211 | -0.208 | 7360 |
| 5674 | naftifine          | 12 $\mu$ M | PC3  | 0 | -0.211 | -0.129 | 7273 |

|      |                     |            |      |   |        |        |      |
|------|---------------------|------------|------|---|--------|--------|------|
| 5675 | pyrithyldione       | 24 $\mu$ M | PC3  | 0 | -0.211 | -0.131 | 7153 |
| 5676 | bupivacaine         | 12 $\mu$ M | MCF7 | 0 | -0.212 | -0.192 | 7435 |
| 5677 | sulfadimethoxine    | 13 $\mu$ M | HL60 | 0 | -0.212 | -0.224 | 2578 |
| 5678 | tolnaftate          | 13 $\mu$ M | MCF7 | 0 | -0.212 | -0.224 | 1501 |
| 5679 | tacrine             | 16 $\mu$ M | MCF7 | 0 | -0.212 | -0.211 | 5297 |
| 5680 | dapsone             | 16 $\mu$ M | MCF7 | 0 | -0.212 | -0.218 | 1705 |
| 5681 | Prestwick-984       | 9 $\mu$ M  | HL60 | 0 | -0.212 | -0.213 | 2903 |
| 5682 | timolol             | 9 $\mu$ M  | PC3  | 0 | -0.212 | -0.147 | 4685 |
| 5683 | pentoxifylline      | 14 $\mu$ M | PC3  | 0 | -0.213 | -0.138 | 2127 |
| 5684 | neostigmine bromide | 13 $\mu$ M | MCF7 | 0 | -0.213 | -0.221 | 5335 |
| 5685 | naproxen            | 17 $\mu$ M | PC3  | 0 | -0.213 | -0.125 | 6358 |
| 5686 | streptomycin        | 3 $\mu$ M  | MCF7 | 0 | -0.213 | -0.247 | 7194 |
| 5687 | sulindac            | 11 $\mu$ M | PC3  | 0 | -0.213 | -0.137 | 5103 |
| 5688 | halofantrine        | 7 $\mu$ M  | HL60 | 0 | -0.214 | -0.231 | 3130 |
| 5689 | benzocaine          | 24 $\mu$ M | HL60 | 0 | -0.214 | -0.208 | 2167 |
| 5690 | triamterene         | 16 $\mu$ M | PC3  | 0 | -0.215 | -0.116 | 1819 |
| 5691 | Gly-His-Lys         | 1 $\mu$ M  | MCF7 | 0 | -0.215 | -0.214 | 6575 |
| 5692 | prednisone          | 11 $\mu$ M | PC3  | 0 | -0.215 | -0.132 | 4577 |
| 5693 | heptaminol          | 22 $\mu$ M | PC3  | 0 | -0.215 | -0.13  | 1825 |
| 5694 | Prestwick-692       | 7 $\mu$ M  | PC3  | 0 | -0.215 | -0.138 | 4599 |
| 5695 | homatropine         | 11 $\mu$ M | MCF7 | 0 | -0.215 | -0.232 | 1684 |
| 5696 | PF-00539758-00      | 10 $\mu$ M | PC3  | 0 | -0.216 | -0.137 | 6421 |
| 5697 | meclofenamic acid   | 12 $\mu$ M | MCF7 | 0 | -0.216 | -0.18  | 7038 |
| 5698 | dapsone             | 16 $\mu$ M | HL60 | 0 | -0.216 | -0.204 | 1868 |
| 5699 | propidium iodide    | 6 $\mu$ M  | HL60 | 0 | -0.216 | -0.181 | 2541 |
| 5700 | epirizole           | 17 $\mu$ M | PC3  | 0 | -0.216 | -0.156 | 1803 |
| 5701 | procarbazine        | 16 $\mu$ M | HL60 | 0 | -0.217 | -0.23  | 2971 |
| 5702 | nifedipine          | 12 $\mu$ M | PC3  | 0 | -0.217 | -0.161 | 1814 |
| 5703 | isoniazid           | 29 $\mu$ M | MCF7 | 0 | -0.217 | -0.194 | 7197 |
| 5704 | lansoprazole        | 11 $\mu$ M | HL60 | 0 | -0.217 | -0.269 | 2967 |
| 5705 | clozapine           | 10 $\mu$ M | HL60 | 0 | -0.217 | -0.191 | 1170 |
| 5706 | xamoterol           | 5 $\mu$ M  | MCF7 | 0 | -0.218 | -0.209 | 5363 |
| 5707 | gentamicin          | 3 $\mu$ M  | PC3  | 0 | -0.218 | -0.112 | 5883 |
| 5708 | thiamphenicol       | 11 $\mu$ M | PC3  | 0 | -0.218 | -0.149 | 1826 |
| 5709 | estradiol           | 10 nM      | HL60 | 0 | -0.218 | -0.234 | 2701 |
| 5710 | ondansetron         | 12 $\mu$ M | HL60 | 0 | -0.219 | -0.201 | 6153 |
| 5711 | aconitine           | 6 $\mu$ M  | PC3  | 0 | -0.219 | -0.168 | 7149 |
| 5712 | DL-PPMP             | 2 $\mu$ M  | MCF7 | 0 | -0.219 | -0.236 | 1121 |

|      |                     |            |      |   |        |        |      |
|------|---------------------|------------|------|---|--------|--------|------|
| 5713 | diphenhydramine     | 14 $\mu$ M | PC3  | 0 | -0.219 | -0.124 | 1830 |
| 5714 | viomycin            | 5 $\mu$ M  | PC3  | 0 | -0.219 | -0.165 | 7278 |
| 5715 | dexibuprofen        | 19 $\mu$ M | HL60 | 0 | -0.219 | -0.213 | 3094 |
| 5716 | levopropoxyphene    | 7 $\mu$ M  | HL60 | 0 | -0.219 | -0.249 | 2980 |
| 5717 | adiphenine          | 11 $\mu$ M | PC3  | 0 | -0.219 | -0.143 | 1831 |
| 5718 | cefmetazole         | 8 $\mu$ M  | HL60 | 0 | -0.22  | -0.193 | 2524 |
| 5719 | Prestwick-691       | 14 $\mu$ M | MCF7 | 0 | -0.22  | -0.238 | 2813 |
| 5720 | merbromin           | 5 $\mu$ M  | HL60 | 0 | -0.22  | -0.21  | 2577 |
| 5721 | BCB000040           | 10 $\mu$ M | MCF7 | 0 | -0.22  | -0.254 | 7554 |
| 5722 | thiamazole          | 35 $\mu$ M | HL60 | 0 | -0.22  | -0.194 | 2570 |
| 5723 | propoxycaine        | 12 $\mu$ M | PC3  | 0 | -0.22  | -0.15  | 7155 |
| 5724 | cefotiam            | 7 $\mu$ M  | HL60 | 0 | -0.221 | -0.183 | 2458 |
| 5725 | ambroxol            | 10 $\mu$ M | MCF7 | 0 | -0.221 | -0.243 | 5319 |
| 5726 | tyrphostin AG-1478  | 32 $\mu$ M | MCF7 | 0 | -0.222 | -0.242 | 1141 |
| 5727 | Chicago Sky Blue 6B | 4 $\mu$ M  | HL60 | 0 | -0.223 | -0.227 | 1330 |
| 5728 | pyrithyldione       | 24 $\mu$ M | MCF7 | 0 | -0.224 | -0.226 | 3482 |
| 5729 | naproxen            | 17 $\mu$ M | MCF7 | 0 | -0.224 | -0.208 | 1706 |
| 5730 | nadide              | 6 $\mu$ M  | HL60 | 0 | -0.224 | -0.192 | 2529 |
| 5731 | clemastine          | 9 $\mu$ M  | MCF7 | 0 | -0.224 | -0.23  | 7443 |
| 5732 | chlorpromazine      | 11 $\mu$ M | HL60 | 0 | -0.224 | -0.246 | 1864 |
| 5733 | isoflupredone       | 10 $\mu$ M | HL60 | 0 | -0.224 | -0.24  | 1873 |
| 5734 | naftidrofuryl       | 8 $\mu$ M  | MCF7 | 0 | -0.224 | -0.235 | 5287 |
| 5735 | sirolimus           | 100 nM     | HL60 | 0 | -0.224 | -0.247 | 1183 |
| 5736 | heptaminol          | 22 $\mu$ M | HL60 | 0 | -0.225 | -0.199 | 1866 |
| 5737 | harpagoside         | 8 $\mu$ M  | MCF7 | 0 | -0.225 | -0.231 | 7355 |
| 5738 | flucloxacillin      | 8 $\mu$ M  | HL60 | 0 | -0.226 | -0.183 | 3128 |
| 5739 | dl-alpha tocopherol | 9 $\mu$ M  | HL60 | 0 | -0.226 | -0.234 | 1320 |
| 5740 | diethylcarbamazine  | 10 $\mu$ M | MCF7 | 0 | -0.226 | -0.239 | 7425 |
| 5741 | alprostadil         | 11 $\mu$ M | MCF7 | 0 | -0.227 | -0.213 | 7358 |
| 5742 | dimenhydrinate      | 9 $\mu$ M  | MCF7 | 0 | -0.228 | -0.211 | 7431 |
| 5743 | corticosterone      | 12 $\mu$ M | HL60 | 0 | -0.228 | -0.23  | 1307 |
| 5744 | haloperidol         | 10 $\mu$ M | MCF7 | 0 | -0.228 | -0.238 | 1082 |
| 5745 | clozapine           | 12 $\mu$ M | HL60 | 0 | -0.228 | -0.249 | 1289 |
| 5746 | vinburnine          | 14 $\mu$ M | PC3  | 0 | -0.229 | -0.175 | 7154 |
| 5747 | 3-acetamidocoumarin | 20 $\mu$ M | MCF7 | 0 | -0.229 | -0.247 | 7361 |
| 5748 | SR-95639A           | 10 $\mu$ M | HL60 | 0 | -0.229 | -0.237 | 1336 |
| 5749 | betulin             | 9 $\mu$ M  | HL60 | 0 | -0.231 | -0.237 | 2952 |
| 5750 | isoflupredone       | 10 $\mu$ M | PC3  | 0 | -0.232 | -0.171 | 1832 |

|      |                                   |             |        |        |        |        |      |
|------|-----------------------------------|-------------|--------|--------|--------|--------|------|
| 5751 | asiaticoside                      | 4 $\mu$ M   | HL60   | 0      | -0.232 | -0.22  | 2943 |
| 5752 | bumetanide                        | 11 $\mu$ M  | MCF7   | 0      | -0.232 | -0.256 | 7440 |
| 5753 | streptozocin                      | 15 $\mu$ M  | HL60   | 0      | -0.233 | -0.24  | 2535 |
| 5754 | fulvestrant                       | 10 nM       | HL60   | 0      | -0.235 | -0.233 | 1179 |
| 5755 | podophyllotoxin                   | 10 $\mu$ M  | MCF7   | 0      | -0.235 | -0.202 | 7198 |
| 5756 | cyclic adenosine<br>monophosphate | 12 $\mu$ M  | HL60   | 0      | -0.236 | -0.245 | 2969 |
| 5757 | chlortalidone                     | 12 $\mu$ M  | PC3    | 0      | -0.236 | -0.179 | 7152 |
| 5758 | diprophylline                     | 16 $\mu$ M  | HL60   | 0      | -0.236 | -0.173 | 1853 |
| 5759 | enalapril                         | 8 $\mu$ M   | MCF7   | 0      | -0.238 | -0.235 | 7428 |
| 5760 | viomycin                          | 5 $\mu$ M   | HL60   | 0      | -0.238 | -0.223 | 2979 |
| 5761 | adiphenine                        | 11 $\mu$ M  | PC3    | 0      | -0.239 | -0.132 | 7279 |
| 5762 | azapropazone                      | 13 $\mu$ M  | PC3    | 0      | -0.24  | -0.168 | 7277 |
| 5763 | estradiol                         | 10 nM       | MCF7   | 0      | -0.24  | -0.214 | 1021 |
| 5764 | chlorogenic acid                  | 11 $\mu$ M  | HL60   | 0      | -0.242 | -0.252 | 1346 |
| 5765 | ozagrel                           | 15 $\mu$ M  | HL60   | 0      | -0.242 | -0.257 | 2942 |
| 5766 | boldine                           | 12 $\mu$ M  | HL60   | 0      | -0.246 | -0.199 | 2148 |
| 5767 | proguanil                         | 14 $\mu$ M  | HL60   | 0      | -0.249 | -0.234 | 2944 |
| 5768 | homatropine                       | 11 $\mu$ M  | HL60   | 0      | -0.25  | -0.219 | 1848 |
| 5769 | diphenhydramine                   | 14 $\mu$ M  | HL60   | 0      | -0.251 | -0.262 | 1871 |
| 5770 | adiphenine                        | 11 $\mu$ M  | HL60   | 0      | -0.261 | -0.275 | 1872 |
| 5771 | metformin                         | 24 $\mu$ M  | HL60   | 0      | -0.262 | -0.256 | 1858 |
| 5772 | NU-1025                           | 100 $\mu$ M | MCF7   | -0.436 | -0.066 | 0.072  | 313  |
| 5773 | iloprost                          | 1 $\mu$ M   | SKMEL5 | -0.47  | -0.1   | 0.048  | 496  |
| 5774 | exisulind                         | 50 $\mu$ M  | MCF7   | -0.473 | -0.068 | 0.082  | 314  |
| 5775 | tolnaftate                        | 13 $\mu$ M  | PC3    | -0.474 | -0.084 | 0.066  | 4221 |
| 5776 | chlorhexidine                     | 8 $\mu$ M   | PC3    | -0.475 | -0.107 | 0.043  | 1942 |
| 5777 | raloxifene                        | 100 nM      | HL60   | -0.475 | -0.078 | 0.073  | 388  |
| 5778 | monastrol                         | 20 $\mu$ M  | MCF7   | -0.477 | -0.075 | 0.076  | 614  |
| 5779 | 0173570-0000                      | 1 $\mu$ M   | PC3    | -0.477 | -0.096 | 0.055  | 3693 |
| 5780 | betonicine                        | 25 $\mu$ M  | PC3    | -0.486 | -0.106 | 0.047  | 4301 |
| 5781 | ciclosporin                       | 1 $\mu$ M   | MCF7   | -0.486 | -0.066 | 0.088  | 261  |
| 5782 | dicloxacillin                     | 8 $\mu$ M   | PC3    | -0.49  | -0.086 | 0.069  | 6666 |
| 5783 | SC-58125                          | 10 $\mu$ M  | SKMEL5 | -0.495 | -0.075 | 0.081  | 507  |
| 5784 | Prestwick-674                     | 14 $\mu$ M  | PC3    | -0.501 | -0.1   | 0.058  | 3716 |
| 5785 | novobiocin                        | 100 $\mu$ M | MCF7   | -0.514 | -0.083 | 0.08   | 342  |
| 5786 | thioridazine                      | 10 $\mu$ M  | MCF7   | -0.515 | -0.067 | 0.096  | 5916 |
| 5787 | tanespimycin                      | 1 $\mu$ M   | PC3    | -0.516 | -0.1   | 0.064  | 4450 |

|      |                         |        |      |        |        |       |      |
|------|-------------------------|--------|------|--------|--------|-------|------|
| 5788 | karakoline              | 11 µM  | PC3  | -0.518 | -0.091 | 0.073 | 4297 |
| 5789 | tetraethylenepentamine  | 100 µM | PC3  | -0.52  | -0.097 | 0.068 | 457  |
| 5790 | ketoprofen              | 16 µM  | PC3  | -0.525 | -0.099 | 0.067 | 3729 |
| 5791 | sirolimus               | 100 nM | PC3  | -0.526 | -0.12  | 0.047 | 4466 |
| 5792 | carbenoxolone           | 7 µM   | MCF7 | -0.528 | -0.072 | 0.095 | 4173 |
| 5793 | PF-00562151-00          | 10 µM  | MCF7 | -0.53  | -0.078 | 0.09  | 5954 |
| 5794 | mexiletine              | 19 µM  | MCF7 | -0.53  | -0.069 | 0.099 | 3973 |
| 5795 | metrizamide             | 5 µM   | MCF7 | -0.531 | -0.092 | 0.076 | 4156 |
| 5796 | tanespimycin            | 1 µM   | MCF7 | -0.533 | -0.095 | 0.074 | 381  |
| 5797 | mebeverine              | 9 µM   | MCF7 | -0.535 | -0.098 | 0.072 | 3193 |
| 5798 | labetalol               | 11 µM  | PC3  | -0.535 | -0.108 | 0.061 | 4473 |
| 5799 | diclofenac              | 10 µM  | MCF7 | -0.539 | -0.082 | 0.088 | 333  |
| 5800 | ciclopirox              | 15 µM  | PC3  | -0.541 | -0.098 | 0.073 | 6677 |
| 5801 | diperodon               | 9 µM   | PC3  | -0.541 | -0.102 | 0.069 | 4498 |
| 5802 | clindamycin             | 9 µM   | HL60 | -0.542 | -0.084 | 0.088 | 1373 |
| 5803 | triamcinolone           | 10 µM  | MCF7 | -0.543 | -0.09  | 0.082 | 2241 |
| 5804 | vincamine               | 11 µM  | MCF7 | -0.544 | -0.088 | 0.084 | 3865 |
| 5805 | sulfamethizole          | 15 µM  | PC3  | -0.545 | -0.098 | 0.074 | 5798 |
| 5806 | dexamethasone           | 1 µM   | MCF7 | -0.549 | -0.073 | 0.101 | 255  |
| 5807 | xylazine                | 18 µM  | PC3  | -0.55  | -0.122 | 0.052 | 4066 |
| 5808 | fendiline               | 11 µM  | MCF7 | -0.554 | -0.106 | 0.07  | 3190 |
| 5809 | NU-1025                 | 100 µM | MCF7 | -0.554 | -0.093 | 0.082 | 608  |
| 5810 | famprofazone            | 11 µM  | MCF7 | -0.554 | -0.089 | 0.086 | 3834 |
| 5811 | quinpirole              | 1 µM   | MCF7 | -0.556 | -0.099 | 0.077 | 456  |
| 5812 | trimethadione           | 28 µM  | PC3  | -0.558 | -0.082 | 0.095 | 4086 |
| 5813 | bendroflumethiazide     | 9 µM   | PC3  | -0.558 | -0.109 | 0.067 | 4315 |
| 5814 | famotidine              | 12 µM  | PC3  | -0.56  | -0.108 | 0.069 | 1946 |
| 5815 | tiratricol              | 6 µM   | MCF7 | -0.56  | -0.088 | 0.09  | 2259 |
| 5816 | diphemanil metilsulfate | 10 µM  | PC3  | -0.561 | -0.108 | 0.069 | 1912 |
| 5817 | citicolone              | 25 µM  | MCF7 | -0.565 | -0.081 | 0.097 | 3836 |
| 5818 | dioxybenzone            | 16 µM  | PC3  | -0.565 | -0.116 | 0.063 | 4638 |
| 5819 | azathioprine            | 14 µM  | PC3  | -0.565 | -0.117 | 0.062 | 1945 |
| 5820 | lidocaine               | 15 µM  | PC3  | -0.566 | -0.105 | 0.074 | 1917 |
| 5821 | nystatin                | 4 µM   | PC3  | -0.567 | -0.111 | 0.068 | 4223 |
| 5822 | ethisterone             | 13 µM  | MCF7 | -0.569 | -0.08  | 0.1   | 3975 |
| 5823 | perphenazine            | 10 µM  | PC3  | -0.57  | -0.116 | 0.064 | 4637 |
| 5824 | meclocyline             | 6 µM   | PC3  | -0.573 | -0.108 | 0.073 | 6637 |
| 5825 | propofol                | 22 µM  | MCF7 | -0.573 | -0.096 | 0.085 | 3386 |

|      |                     |            |      |        |        |       |      |
|------|---------------------|------------|------|--------|--------|-------|------|
| 5826 | metergoline         | 10 $\mu$ M | PC3  | -0.574 | -0.118 | 0.064 | 6744 |
| 5827 | tanespimycin        | 1 $\mu$ M  | MCF7 | -0.574 | -0.09  | 0.092 | 5914 |
| 5828 | mesalazine          | 26 $\mu$ M | PC3  | -0.575 | -0.095 | 0.087 | 5888 |
| 5829 | W-13                | 10 $\mu$ M | MCF7 | -0.576 | -0.09  | 0.092 | 643  |
| 5830 | gibberellic acid    | 12 $\mu$ M | PC3  | -0.576 | -0.103 | 0.079 | 4234 |
| 5831 | amprolium           | 13 $\mu$ M | PC3  | -0.577 | -0.113 | 0.07  | 1898 |
| 5832 | oxantel             | 7 $\mu$ M  | PC3  | -0.577 | -0.091 | 0.091 | 6738 |
| 5833 | probutol            | 10 $\mu$ M | MCF7 | -0.578 | -0.104 | 0.079 | 592  |
| 5834 | bucladesine         | 8 $\mu$ M  | HL60 | -0.582 | -0.096 | 0.088 | 2741 |
| 5835 | geldanamycin        | 1 $\mu$ M  | PC3  | -0.582 | -0.117 | 0.067 | 4452 |
| 5836 | norfloxacin         | 13 $\mu$ M | MCF7 | -0.586 | -0.09  | 0.095 | 2253 |
| 5837 | ursolic acid        | 9 $\mu$ M  | PC3  | -0.586 | -0.109 | 0.076 | 5825 |
| 5838 | nifedipine          | 10 $\mu$ M | MCF7 | -0.587 | -0.102 | 0.084 | 603  |
| 5839 | phenformin          | 10 $\mu$ M | MCF7 | -0.587 | -0.097 | 0.088 | 21   |
| 5840 | meclofenoxate       | 14 $\mu$ M | MCF7 | -0.588 | -0.093 | 0.093 | 4729 |
| 5841 | torasemide          | 11 $\mu$ M | PC3  | -0.59  | -0.104 | 0.083 | 5057 |
| 5842 | hydrochlorothiazide | 13 $\mu$ M | PC3  | -0.59  | -0.12  | 0.067 | 1906 |
| 5843 | praziquantel        | 13 $\mu$ M | MCF7 | -0.594 | -0.107 | 0.081 | 3189 |
| 5844 | thiethylperazine    | 6 $\mu$ M  | PC3  | -0.595 | -0.133 | 0.055 | 5756 |
| 5845 | proscillaridin      | 8 $\mu$ M  | MCF7 | -0.595 | -0.094 | 0.095 | 4404 |
| 5846 | helveticoside       | 7 $\mu$ M  | MCF7 | -0.599 | -0.089 | 0.1   | 6047 |
| 5847 | cicloheximide       | 14 $\mu$ M | PC3  | -0.599 | -0.107 | 0.082 | 5743 |
| 5848 | oleandomycin        | 5 $\mu$ M  | PC3  | -0.599 | -0.121 | 0.068 | 1935 |
| 5849 | spiramycin          | 5 $\mu$ M  | MCF7 | -0.6   | -0.085 | 0.105 | 3844 |
| 5850 | tetrandrine         | 6 $\mu$ M  | PC3  | -0.6   | -0.111 | 0.079 | 5821 |
| 5851 | metixene            | 12 $\mu$ M | PC3  | -0.601 | -0.089 | 0.101 | 6672 |
| 5852 | calmidazolium       | 5 $\mu$ M  | MCF7 | -0.602 | -0.109 | 0.081 | 486  |
| 5853 | loxapine            | 9 $\mu$ M  | PC3  | -0.603 | -0.108 | 0.082 | 6694 |
| 5854 | probutol            | 8 $\mu$ M  | MCF7 | -0.604 | -0.088 | 0.103 | 3223 |
| 5855 | tanespimycin        | 1 $\mu$ M  | PC3  | -0.608 | -0.113 | 0.079 | 5958 |
| 5856 | proxymetacaine      | 12 $\mu$ M | MCF7 | -0.608 | -0.112 | 0.08  | 5433 |
| 5857 | altizide            | 10 $\mu$ M | MCF7 | -0.609 | -0.109 | 0.084 | 6089 |
| 5858 | protriptyline       | 13 $\mu$ M | MCF7 | -0.609 | -0.094 | 0.099 | 6498 |
| 5859 | N6-methyladenosine  | 14 $\mu$ M | PC3  | -0.609 | -0.139 | 0.054 | 6732 |
| 5860 | levodopa            | 20 $\mu$ M | PC3  | -0.611 | -0.124 | 0.069 | 4571 |
| 5861 | metitepine          | 8 $\mu$ M  | MCF7 | -0.612 | -0.087 | 0.107 | 5413 |
| 5862 | mefloquine          | 10 $\mu$ M | MCF7 | -0.612 | -0.082 | 0.112 | 2210 |
| 5863 | trifluoperazine     | 10 $\mu$ M | HL60 | -0.613 | -0.103 | 0.091 | 2684 |

|      |                                    |            |      |        |        |       |      |
|------|------------------------------------|------------|------|--------|--------|-------|------|
| 5864 | mafenide                           | 18 $\mu$ M | MCF7 | -0.615 | -0.093 | 0.101 | 5499 |
| 5865 | cinchonidine                       | 14 $\mu$ M | PC3  | -0.615 | -0.105 | 0.089 | 5833 |
| 5866 | suloctidil                         | 12 $\mu$ M | PC3  | -0.615 | -0.1   | 0.095 | 6675 |
| 5867 | isometheptene                      | 8 $\mu$ M  | MCF7 | -0.616 | -0.099 | 0.096 | 6524 |
| 5868 | azacyclonol                        | 15 $\mu$ M | MCF7 | -0.616 | -0.097 | 0.098 | 5398 |
| 5869 | phensuximide                       | 21 $\mu$ M | PC3  | -0.616 | -0.121 | 0.074 | 5097 |
| 5870 | pempidine                          | 13 $\mu$ M | MCF7 | -0.621 | -0.103 | 0.094 | 3832 |
| 5871 | felodipine                         | 10 $\mu$ M | PC3  | -0.621 | -0.112 | 0.084 | 6695 |
| 5872 | levomepromazine                    | 9 $\mu$ M  | PC3  | -0.622 | -0.117 | 0.08  | 7399 |
| 5873 | ascorbic acid                      | 22 $\mu$ M | MCF7 | -0.622 | -0.087 | 0.11  | 3225 |
| 5874 | ritodrine                          | 12 $\mu$ M | PC3  | -0.623 | -0.127 | 0.071 | 4619 |
| 5875 | terguride                          | 9 $\mu$ M  | PC3  | -0.624 | -0.111 | 0.086 | 4633 |
| 5876 | mianserin                          | 13 $\mu$ M | MCF7 | -0.624 | -0.099 | 0.098 | 2231 |
| 5877 | MK-886                             | 1 $\mu$ M  | MCF7 | -0.628 | -0.117 | 0.082 | 601  |
| 5878 | chlorpromazine                     | 1 $\mu$ M  | MCF7 | -0.629 | -0.124 | 0.075 | 426  |
| 5879 | ondansetron                        | 12 $\mu$ M | MCF7 | -0.631 | -0.102 | 0.098 | 3575 |
| 5880 | ciprofloxacin                      | 11 $\mu$ M | PC3  | -0.631 | -0.125 | 0.074 | 6700 |
| 5881 | 16,16-<br>dimethylprostaglandin E2 | 10 $\mu$ M | PC3  | -0.632 | -0.111 | 0.089 | 6562 |
| 5882 | sulpiride                          | 12 $\mu$ M | MCF7 | -0.634 | -0.088 | 0.113 | 4389 |
| 5883 | trapidil                           | 19 $\mu$ M | MCF7 | -0.634 | -0.106 | 0.095 | 6515 |
| 5884 | Prestwick-1100                     | 9 $\mu$ M  | MCF7 | -0.634 | -0.102 | 0.098 | 3880 |
| 5885 | tretinoin                          | 1 $\mu$ M  | PC3  | -0.636 | -0.132 | 0.069 | 1211 |
| 5886 | scopolamine                        | 12 $\mu$ M | MCF7 | -0.637 | -0.096 | 0.105 | 4803 |
| 5887 | orlistat                           | 10 $\mu$ M | MCF7 | -0.637 | -0.076 | 0.125 | 6383 |
| 5888 | CP-319743                          | 10 $\mu$ M | PC3  | -0.638 | -0.121 | 0.08  | 7537 |
| 5889 | paclitaxel                         | 5 $\mu$ M  | MCF7 | -0.638 | -0.115 | 0.087 | 1542 |
| 5890 | furaltadone                        | 11 $\mu$ M | HL60 | -0.639 | -0.104 | 0.098 | 2554 |
| 5891 | methylbenzethonium<br>chloride     | 9 $\mu$ M  | MCF7 | -0.64  | -0.107 | 0.095 | 3850 |
| 5892 | hydrocotarnine                     | 13 $\mu$ M | PC3  | -0.642 | -0.123 | 0.08  | 4489 |
| 5893 | danazol                            | 12 $\mu$ M | PC3  | -0.644 | -0.108 | 0.095 | 1954 |
| 5894 | econazole                          | 9 $\mu$ M  | PC3  | -0.644 | -0.127 | 0.077 | 7305 |
| 5895 | megestrol                          | 10 $\mu$ M | MCF7 | -0.646 | -0.103 | 0.101 | 6468 |
| 5896 | butyl hydroxybenzoate              | 21 $\mu$ M | MCF7 | -0.646 | -0.1   | 0.104 | 5608 |
| 5897 | midecamycin                        | 5 $\mu$ M  | PC3  | -0.647 | -0.104 | 0.101 | 1943 |
| 5898 | proguanil                          | 14 $\mu$ M | MCF7 | -0.648 | -0.109 | 0.096 | 3505 |
| 5899 | phentolamine                       | 13 $\mu$ M | MCF7 | -0.648 | -0.103 | 0.102 | 2323 |

|      |                  |            |      |        |        |       |      |
|------|------------------|------------|------|--------|--------|-------|------|
| 5900 | urapidil         | 9 $\mu$ M  | PC3  | -0.649 | -0.127 | 0.078 | 6696 |
| 5901 | diprophylline    | 16 $\mu$ M | MCF7 | -0.65  | -0.104 | 0.101 | 5482 |
| 5902 | aciclovir        | 18 $\mu$ M | PC3  | -0.652 | -0.125 | 0.081 | 1960 |
| 5903 | tenoxicam        | 12 $\mu$ M | PC3  | -0.652 | -0.15  | 0.056 | 4102 |
| 5904 | allantoin        | 25 $\mu$ M | MCF7 | -0.652 | -0.084 | 0.122 | 5471 |
| 5905 | josamycin        | 5 $\mu$ M  | PC3  | -0.653 | -0.117 | 0.089 | 1950 |
| 5906 | clorsulon        | 11 $\mu$ M | HL60 | -0.655 | -0.119 | 0.089 | 1735 |
| 5907 | puromycin        | 7 $\mu$ M  | MCF7 | -0.656 | -0.095 | 0.113 | 3310 |
| 5908 | bucladesine      | 20 $\mu$ M | MCF7 | -0.656 | -0.112 | 0.096 | 591  |
| 5909 | dextromethorphan | 11 $\mu$ M | MCF7 | -0.658 | -0.105 | 0.104 | 5401 |
| 5910 | ivermectin       | 5 $\mu$ M  | PC3  | -0.658 | -0.103 | 0.105 | 5853 |
| 5911 | pindolol         | 16 $\mu$ M | MCF7 | -0.658 | -0.106 | 0.102 | 6834 |
| 5912 | SC-19220         | 10 $\mu$ M | PC3  | -0.659 | -0.132 | 0.076 | 7065 |
| 5913 | tanespimycin     | 1 $\mu$ M  | HL60 | -0.66  | -0.103 | 0.106 | 2666 |
| 5914 | paclitaxel       | 5 $\mu$ M  | PC3  | -0.66  | -0.112 | 0.097 | 1959 |
| 5915 | salsolinol       | 15 $\mu$ M | PC3  | -0.66  | -0.102 | 0.107 | 4232 |
| 5916 | chlorhexidine    | 8 $\mu$ M  | PC3  | -0.661 | -0.125 | 0.084 | 6302 |
| 5917 | nefopam          | 14 $\mu$ M | MCF7 | -0.661 | -0.087 | 0.122 | 4752 |
| 5918 | flupentixol      | 8 $\mu$ M  | MCF7 | -0.662 | -0.106 | 0.103 | 2643 |
| 5919 | pizotifen        | 9 $\mu$ M  | MCF7 | -0.664 | -0.092 | 0.118 | 5491 |
| 5920 | PF-00562151-00   | 10 $\mu$ M | PC3  | -0.665 | -0.11  | 0.1   | 6863 |
| 5921 | diprophylline    | 16 $\mu$ M | PC3  | -0.665 | -0.143 | 0.067 | 5063 |
| 5922 | ketoconazole     | 8 $\mu$ M  | MCF7 | -0.665 | -0.1   | 0.111 | 2640 |
| 5923 | orphenadrine     | 13 $\mu$ M | MCF7 | -0.667 | -0.088 | 0.123 | 3883 |
| 5924 | flumequine       | 15 $\mu$ M | MCF7 | -0.668 | -0.11  | 0.102 | 5529 |
| 5925 | apomorphine      | 6 $\mu$ M  | PC3  | -0.668 | -0.122 | 0.09  | 6683 |
| 5926 | mianserin        | 13 $\mu$ M | PC3  | -0.67  | -0.117 | 0.095 | 5786 |
| 5927 | leflunomide      | 15 $\mu$ M | MCF7 | -0.67  | -0.117 | 0.095 | 7238 |
| 5928 | ciprofloxacin    | 11 $\mu$ M | PC3  | -0.671 | -0.135 | 0.078 | 1939 |
| 5929 | terbutaline      | 7 $\mu$ M  | PC3  | -0.671 | -0.138 | 0.075 | 5764 |
| 5930 | carbenoxolone    | 7 $\mu$ M  | MCF7 | -0.672 | -0.122 | 0.091 | 3353 |
| 5931 | altretamine      | 19 $\mu$ M | PC3  | -0.672 | -0.108 | 0.104 | 4627 |
| 5932 | mesoridazine     | 7 $\mu$ M  | PC3  | -0.673 | -0.124 | 0.089 | 7256 |
| 5933 | tanespimycin     | 1 $\mu$ M  | PC3  | -0.674 | -0.143 | 0.07  | 1218 |
| 5934 | emetine          | 7 $\mu$ M  | MCF7 | -0.675 | -0.111 | 0.103 | 2801 |
| 5935 | santonin         | 16 $\mu$ M | MCF7 | -0.677 | -0.12  | 0.094 | 3877 |
| 5936 | thioridazine     | 10 $\mu$ M | HL60 | -0.679 | -0.084 | 0.131 | 2690 |
| 5937 | sulfaquinoxaline | 12 $\mu$ M | MCF7 | -0.68  | -0.104 | 0.111 | 6788 |



|      |                  |        |      |        |        |       |      |
|------|------------------|--------|------|--------|--------|-------|------|
| 5938 | erythromycin     | 5 µM   | PC3  | -0.681 | -0.113 | 0.103 | 1928 |
| 5939 | lanatoside C     | 4 µM   | MCF7 | -0.682 | -0.102 | 0.114 | 3852 |
| 5940 | MG-262           | 100 nM | PC3  | -0.683 | -0.133 | 0.083 | 7068 |
| 5941 | solanine         | 5 µM   | MCF7 | -0.683 | -0.134 | 0.082 | 4166 |
| 5942 | megestrol        | 10 µM  | MCF7 | -0.684 | -0.111 | 0.105 | 5013 |
| 5943 | securinine       | 18 µM  | MCF7 | -0.686 | -0.121 | 0.096 | 6831 |
| 5944 | cefotaxime       | 8 µM   | PC3  | -0.686 | -0.134 | 0.083 | 2072 |
| 5945 | alfadolone       | 10 µM  | PC3  | -0.686 | -0.138 | 0.079 | 7262 |
| 5946 | chloropyrazine   | 35 µM  | HL60 | -0.687 | -0.113 | 0.104 | 6148 |
| 5947 | niflumic acid    | 14 µM  | MCF7 | -0.687 | -0.088 | 0.13  | 5490 |
| 5948 | verapamil        | 8 µM   | MCF7 | -0.688 | -0.107 | 0.111 | 5387 |
| 5949 | isocarboxazid    | 17 µM  | HL60 | -0.688 | -0.115 | 0.103 | 2562 |
| 5950 | glafenine        | 10 µM  | PC3  | -0.688 | -0.129 | 0.089 | 7257 |
| 5951 | pirenzepine      | 9 µM   | PC3  | -0.689 | -0.113 | 0.105 | 5872 |
| 5952 | cyclobenzaprine  | 13 µM  | MCF7 | -0.693 | -0.097 | 0.122 | 4834 |
| 5953 | dicycloverine    | 12 µM  | PC3  | -0.694 | -0.14  | 0.08  | 4581 |
| 5954 | piromidic acid   | 14 µM  | PC3  | -0.694 | -0.139 | 0.08  | 4575 |
| 5955 | lasalocid        | 7 µM   | MCF7 | -0.695 | -0.129 | 0.09  | 4985 |
| 5956 | harmalol         | 15 µM  | MCF7 | -0.695 | -0.1   | 0.12  | 2892 |
| 5957 | dirithromycin    | 5 µM   | MCF7 | -0.696 | -0.118 | 0.102 | 2863 |
| 5958 | atropine oxide   | 12 µM  | MCF7 | -0.696 | -0.114 | 0.107 | 6812 |
| 5959 | withaferin A     | 1 µM   | MCF7 | -0.697 | -0.104 | 0.117 | 3902 |
| 5960 | diphenhydramine  | 14 µM  | PC3  | -0.7   | -0.137 | 0.084 | 7318 |
| 5961 | quipazine        | 9 µM   | MCF7 | -0.701 | -0.115 | 0.106 | 7240 |
| 5962 | strophanthidin   | 10 µM  | PC3  | -0.703 | -0.119 | 0.103 | 5826 |
| 5963 | SC-560           | 10 µM  | PC3  | -0.703 | -0.142 | 0.08  | 6865 |
| 5964 | perhexiline      | 10 µM  | PC3  | -0.703 | -0.103 | 0.12  | 5081 |
| 5965 | tetracycline     | 8 µM   | HL60 | -0.704 | -0.112 | 0.11  | 1397 |
| 5966 | butoconazole     | 8 µM   | HL60 | -0.705 | -0.108 | 0.115 | 2427 |
| 5967 | alverine         | 8 µM   | MCF7 | -0.706 | -0.106 | 0.117 | 2273 |
| 5968 | (-)-isoprenaline | 16 µM  | HL60 | -0.706 | -0.133 | 0.09  | 6149 |
| 5969 | fulvestrant      | 1 µM   | PC3  | -0.708 | -0.141 | 0.083 | 704  |
| 5970 | alverine         | 8 µM   | PC3  | -0.708 | -0.118 | 0.106 | 6345 |
| 5971 | pirlindole       | 12 µM  | HL60 | -0.708 | -0.11  | 0.114 | 3140 |
| 5972 | triamterene      | 16 µM  | PC3  | -0.708 | -0.149 | 0.075 | 7307 |
| 5973 | nocodazole       | 13 µM  | PC3  | -0.709 | -0.124 | 0.1   | 7145 |
| 5974 | flunixin         | 8 µM   | MCF7 | -0.711 | -0.102 | 0.123 | 4735 |
| 5975 | clebopride       | 8 µM   | PC3  | -0.712 | -0.136 | 0.089 | 6311 |

|      |                             |            |      |        |        |       |      |
|------|-----------------------------|------------|------|--------|--------|-------|------|
| 5976 | rilmenidine                 | 8 $\mu$ M  | MCF7 | -0.713 | -0.116 | 0.11  | 6512 |
| 5977 | oxybenzone                  | 18 $\mu$ M | PC3  | -0.714 | -0.135 | 0.091 | 6309 |
| 5978 | colchicine                  | 10 $\mu$ M | MCF7 | -0.716 | -0.092 | 0.135 | 5675 |
| 5979 | vinburnine                  | 14 $\mu$ M | HL60 | -0.717 | -0.113 | 0.114 | 1788 |
| 5980 | azathioprine                | 14 $\mu$ M | MCF7 | -0.717 | -0.125 | 0.102 | 5262 |
| 5981 | piretanide                  | 11 $\mu$ M | HL60 | -0.718 | -0.13  | 0.097 | 6144 |
| 5982 | aminophenazone              | 17 $\mu$ M | PC3  | -0.718 | -0.129 | 0.098 | 2060 |
| 5983 | dipivefrine                 | 10 $\mu$ M | MCF7 | -0.722 | -0.107 | 0.121 | 2744 |
| 5984 | antazoline                  | 13 $\mu$ M | HL60 | -0.723 | -0.118 | 0.11  | 1556 |
| 5985 | orciprenaline               | 8 $\mu$ M  | MCF7 | -0.724 | -0.091 | 0.138 | 4831 |
| 5986 | neomycin                    | 4 $\mu$ M  | PC3  | -0.727 | -0.122 | 0.108 | 5867 |
| 5987 | geldanamycin                | 1 $\mu$ M  | MCF7 | -0.727 | -0.125 | 0.105 | 5225 |
| 5988 | haloperidol                 | 10 $\mu$ M | MCF7 | -0.728 | -0.14  | 0.091 | 5604 |
| 5989 | mafenide                    | 18 $\mu$ M | PC3  | -0.728 | -0.157 | 0.074 | 2124 |
| 5990 | ticarcillin                 | 9 $\mu$ M  | PC3  | -0.73  | -0.111 | 0.12  | 5829 |
| 5991 | astemizole                  | 9 $\mu$ M  | MCF7 | -0.73  | -0.105 | 0.126 | 6807 |
| 5992 | digitoxigenin               | 11 $\mu$ M | MCF7 | -0.73  | -0.129 | 0.102 | 4801 |
| 5993 | tanespimycin                | 1 $\mu$ M  | MCF7 | -0.732 | -0.126 | 0.106 | 428  |
| 5994 | sulpiride                   | 12 $\mu$ M | MCF7 | -0.736 | -0.108 | 0.125 | 1467 |
| 5995 | harmine                     | 16 $\mu$ M | HL60 | -0.736 | -0.114 | 0.118 | 1758 |
| 5996 | thiamine                    | 12 $\mu$ M | HL60 | -0.737 | -0.126 | 0.107 | 1744 |
| 5997 | oxybenzone                  | 18 $\mu$ M | MCF7 | -0.739 | -0.116 | 0.118 | 5410 |
| 5998 | acetylsalicylsalicylic acid | 13 $\mu$ M | MCF7 | -0.742 | -0.12  | 0.114 | 6778 |
| 5999 | sulfapyridine               | 16 $\mu$ M | PC3  | -0.742 | -0.132 | 0.102 | 7151 |
| 6000 | sulfaguanidine              | 19 $\mu$ M | MCF7 | -0.743 | -0.105 | 0.13  | 1495 |
| 6001 | fulvestrant                 | 1 $\mu$ M  | PC3  | -0.744 | -0.164 | 0.071 | 6867 |
| 6002 | mianserin                   | 13 $\mu$ M | HL60 | -0.745 | -0.112 | 0.124 | 1385 |
| 6003 | streptozocin                | 15 $\mu$ M | PC3  | -0.747 | -0.16  | 0.076 | 5836 |
| 6004 | pioglitazone                | 10 $\mu$ M | MCF7 | -0.748 | -0.093 | 0.144 | 7523 |
| 6005 | ramipril                    | 10 $\mu$ M | PC3  | -0.748 | -0.131 | 0.106 | 7144 |
| 6006 | STOCK1N-28457               | 20 $\mu$ M | MCF7 | -0.749 | -0.118 | 0.12  | 6869 |
| 6007 | etodolac                    | 14 $\mu$ M | PC3  | -0.75  | -0.162 | 0.076 | 2091 |
| 6008 | mebeverine                  | 9 $\mu$ M  | HL60 | -0.751 | -0.122 | 0.115 | 1576 |
| 6009 | amodiaquine                 | 9 $\mu$ M  | HL60 | -0.753 | -0.126 | 0.112 | 1570 |
| 6010 | tridihexethyl               | 11 $\mu$ M | MCF7 | -0.754 | -0.131 | 0.108 | 5486 |
| 6011 | chlorphenamine              | 10 $\mu$ M | MCF7 | -0.755 | -0.094 | 0.145 | 6773 |
| 6012 | pheneticillin               | 10 $\mu$ M | MCF7 | -0.757 | -0.117 | 0.122 | 6239 |
| 6013 | ranitidine                  | 11 $\mu$ M | HL60 | -0.759 | -0.123 | 0.117 | 1404 |

|      |                                    |            |      |        |        |       |      |
|------|------------------------------------|------------|------|--------|--------|-------|------|
| 6014 | clebopride                         | 8 $\mu$ M  | MCF7 | -0.759 | -0.124 | 0.116 | 2646 |
| 6015 | cephaeline                         | 6 $\mu$ M  | HL60 | -0.762 | -0.14  | 0.101 | 2429 |
| 6016 | fluspirilene                       | 8 $\mu$ M  | MCF7 | -0.762 | -0.11  | 0.131 | 5008 |
| 6017 | nicergoline                        | 8 $\mu$ M  | PC3  | -0.763 | -0.156 | 0.086 | 2058 |
| 6018 | metformin                          | 24 $\mu$ M | MCF7 | -0.765 | -0.144 | 0.098 | 5487 |
| 6019 | hydroquinine                       | 9 $\mu$ M  | HL60 | -0.765 | -0.129 | 0.113 | 1775 |
| 6020 | nifurtimox                         | 14 $\mu$ M | MCF7 | -0.765 | -0.124 | 0.118 | 7328 |
| 6021 | strophanthidin                     | 10 $\mu$ M | HL60 | -0.767 | -0.11  | 0.133 | 2525 |
| 6022 | zomepirac                          | 13 $\mu$ M | MCF7 | -0.768 | -0.117 | 0.126 | 6815 |
| 6023 | ethosuximide                       | 28 $\mu$ M | PC3  | -0.769 | -0.153 | 0.09  | 7308 |
| 6024 | colforsin                          | 500 nM     | MCF7 | -0.769 | -0.111 | 0.132 | 7055 |
| 6025 | 16,16-<br>dimethylprostaglandin E2 | 10 $\mu$ M | MCF7 | -0.769 | -0.109 | 0.134 | 6597 |
| 6026 | pilocarpine                        | 15 $\mu$ M | HL60 | -0.77  | -0.117 | 0.126 | 2438 |
| 6027 | ampicillin                         | 10 $\mu$ M | MCF7 | -0.77  | -0.123 | 0.121 | 5408 |
| 6028 | etifenin                           | 12 $\mu$ M | HL60 | -0.771 | -0.107 | 0.137 | 2477 |
| 6029 | epivincamine                       | 11 $\mu$ M | MCF7 | -0.772 | -0.129 | 0.116 | 2775 |
| 6030 | isoconazole                        | 10 $\mu$ M | HL60 | -0.774 | -0.118 | 0.127 | 1372 |
| 6031 | chloropyramine                     | 12 $\mu$ M | PC3  | -0.774 | -0.118 | 0.127 | 4589 |
| 6032 | piperacetazine                     | 10 $\mu$ M | HL60 | -0.775 | -0.144 | 0.101 | 6152 |
| 6033 | suloctidil                         | 12 $\mu$ M | MCF7 | -0.776 | -0.144 | 0.102 | 2651 |
| 6034 | suramin sodium                     | 10 $\mu$ M | MCF7 | -0.778 | -0.103 | 0.143 | 7496 |
| 6035 | prenylamine                        | 10 $\mu$ M | MCF7 | -0.78  | -0.108 | 0.139 | 5489 |
| 6036 | terazosin                          | 9 $\mu$ M  | HL60 | -0.78  | -0.144 | 0.103 | 2530 |
| 6037 | bumetanide                         | 11 $\mu$ M | HL60 | -0.78  | -0.135 | 0.112 | 2409 |
| 6038 | nomifensine                        | 11 $\mu$ M | HL60 | -0.781 | -0.142 | 0.105 | 1378 |
| 6039 | (-)-isoprenaline                   | 16 $\mu$ M | MCF7 | -0.781 | -0.103 | 0.144 | 3571 |
| 6040 | ciclopirox                         | 15 $\mu$ M | HL60 | -0.782 | -0.122 | 0.126 | 2456 |
| 6041 | cisapride                          | 9 $\mu$ M  | HL60 | -0.782 | -0.112 | 0.136 | 2443 |
| 6042 | lycorine                           | 12 $\mu$ M | HL60 | -0.783 | -0.127 | 0.121 | 2195 |
| 6043 | bambuterol                         | 10 $\mu$ M | PC3  | -0.784 | -0.14  | 0.108 | 5885 |
| 6044 | cefamandole                        | 8 $\mu$ M  | PC3  | -0.788 | -0.128 | 0.122 | 7394 |
| 6045 | demecarium bromide                 | 6 $\mu$ M  | MCF7 | -0.789 | -0.149 | 0.1   | 2773 |
| 6046 | alprostadi                         | 11 $\mu$ M | PC3  | -0.79  | -0.154 | 0.096 | 4099 |
| 6047 | flucytosine                        | 31 $\mu$ M | HL60 | -0.791 | -0.115 | 0.136 | 3073 |
| 6048 | digoxigenin                        | 10 $\mu$ M | MCF7 | -0.792 | -0.101 | 0.15  | 5275 |
| 6049 | isoxicam                           | 12 $\mu$ M | MCF7 | -0.792 | -0.121 | 0.129 | 7028 |
| 6050 | emetine                            | 7 $\mu$ M  | HL60 | -0.793 | -0.161 | 0.09  | 2145 |

|      |                                         |            |      |        |        |       |      |
|------|-----------------------------------------|------------|------|--------|--------|-------|------|
| 6051 | guanethidine                            | 13 $\mu$ M | HL60 | -0.794 | -0.119 | 0.132 | 1554 |
| 6052 | imipramine                              | 13 $\mu$ M | PC3  | -0.796 | -0.165 | 0.087 | 1807 |
| 6053 | H-89                                    | 500 nM     | MCF7 | -0.801 | -0.121 | 0.133 | 6878 |
| 6054 | proadifen                               | 10 $\mu$ M | MCF7 | -0.801 | -0.117 | 0.136 | 3446 |
| 6055 | dobutamine                              | 12 $\mu$ M | HL60 | -0.805 | -0.128 | 0.127 | 1589 |
| 6056 | tamoxifen                               | 7 $\mu$ M  | HL60 | -0.808 | -0.119 | 0.137 | 1366 |
| 6057 | Prestwick-689                           | 10 $\mu$ M | MCF7 | -0.811 | -0.119 | 0.138 | 7173 |
| 6058 | diphehanil metilsulfate                 | 10 $\mu$ M | MCF7 | -0.814 | -0.112 | 0.146 | 1494 |
| 6059 | doxepin                                 | 13 $\mu$ M | MCF7 | -0.818 | -0.13  | 0.129 | 7415 |
| 6060 | anabasin                                | 25 $\mu$ M | MCF7 | -0.819 | -0.113 | 0.146 | 6774 |
| 6061 | etamivan                                | 18 $\mu$ M | MCF7 | -0.819 | -0.123 | 0.136 | 7021 |
| 6062 | cotinine                                | 23 $\mu$ M | HL60 | -0.821 | -0.137 | 0.123 | 2011 |
| 6063 | hecogenin                               | 9 $\mu$ M  | MCF7 | -0.821 | -0.128 | 0.132 | 7175 |
| 6064 | clemastine                              | 9 $\mu$ M  | MCF7 | -0.823 | -0.13  | 0.131 | 7485 |
| 6065 | glipizide                               | 9 $\mu$ M  | HL60 | -0.825 | -0.124 | 0.137 | 2008 |
| 6066 | diprophylline                           | 16 $\mu$ M | MCF7 | -0.826 | -0.125 | 0.137 | 1689 |
| 6067 | alimemazine                             | 5 $\mu$ M  | MCF7 | -0.826 | -0.126 | 0.136 | 3478 |
| 6068 | phenformin                              | 17 $\mu$ M | HL60 | -0.828 | -0.134 | 0.128 | 2350 |
| 6069 | homochlorcyclizine                      | 10 $\mu$ M | PC3  | -0.829 | -0.135 | 0.127 | 7295 |
| 6070 | artemisinin                             | 14 $\mu$ M | HL60 | -0.83  | -0.126 | 0.137 | 1714 |
| 6071 | colchicine                              | 10 $\mu$ M | HL60 | -0.83  | -0.136 | 0.126 | 1598 |
| 6072 | praziquantel                            | 13 $\mu$ M | HL60 | -0.831 | -0.133 | 0.13  | 1572 |
| 6073 | lovastatin                              | 10 $\mu$ M | HL60 | -0.836 | -0.133 | 0.131 | 2494 |
| 6074 | nadide                                  | 6 $\mu$ M  | MCF7 | -0.841 | -0.119 | 0.147 | 7227 |
| 6075 | 15-delta prostaglandin J2               | 10 $\mu$ M | MCF7 | -0.843 | -0.136 | 0.131 | 6990 |
| 6076 | metanephrine                            | 17 $\mu$ M | MCF7 | -0.865 | -0.138 | 0.136 | 5334 |
| 6077 | mesoridazine                            | 7 $\mu$ M  | MCF7 | -0.866 | -0.138 | 0.136 | 7017 |
| 6078 | ciprofloxacin                           | 11 $\mu$ M | MCF7 | -0.866 | -0.141 | 0.133 | 5299 |
| 6079 | proscillaridin                          | 8 $\mu$ M  | MCF7 | -0.871 | -0.134 | 0.141 | 7340 |
| 6080 | naltrexone                              | 10 $\mu$ M | MCF7 | -0.873 | -0.156 | 0.12  | 6241 |
| 6081 | lanatoside C                            | 4 $\mu$ M  | HL60 | -0.876 | -0.147 | 0.13  | 2193 |
| 6082 | benzylamine                             | 12 $\mu$ M | MCF7 | -0.877 | -0.151 | 0.126 | 7169 |
| 6083 | 11-deoxy-16,16-dimethylprostaglandin E2 | 10 $\mu$ M | PC3  | -0.881 | -0.16  | 0.118 | 7538 |
| 6084 | monorden                                | 100 nM     | HL60 | -0.884 | -0.128 | 0.152 | 1160 |
| 6085 | demecolcine                             | 12 $\mu$ M | MCF7 | -0.885 | -0.143 | 0.137 | 1103 |
| 6086 | 15-delta prostaglandin J2               | 10 $\mu$ M | MCF7 | -0.887 | -0.147 | 0.134 | 1011 |
| 6087 | sulfaphenazole                          | 13 $\mu$ M | MCF7 | -0.895 | -0.136 | 0.147 | 1673 |

|      |                          |            |      |        |        |       |      |
|------|--------------------------|------------|------|--------|--------|-------|------|
| 6088 | SR-95531                 | 11 $\mu$ M | HL60 | -0.897 | -0.146 | 0.138 | 1316 |
| 6089 | thioridazine             | 10 $\mu$ M | HL60 | -0.898 | -0.132 | 0.152 | 1171 |
| 6090 | nitrofuraf               | 20 $\mu$ M | MCF7 | -0.91  | -0.158 | 0.13  | 5321 |
| 6091 | cytochalasin B           | 21 $\mu$ M | MCF7 | -0.917 | -0.134 | 0.156 | 1122 |
| 6092 | cinnarizine              | 11 $\mu$ M | MCF7 | -0.938 | -0.156 | 0.141 | 7174 |
| 6093 | N-acetylmuramic acid     | 14 $\mu$ M | HL60 | -0.946 | -0.157 | 0.142 | 1326 |
| 6094 | 5162773                  | 7 $\mu$ M  | MCF7 | -0.947 | -0.132 | 0.168 | 892  |
| 6095 | dihydroergotamine        | 3 $\mu$ M  | PC3  | -0.949 | -0.221 | 0.079 | 2081 |
| 6096 | bucladesine              | 2 $\mu$ M  | MCF7 | -0.958 | -0.132 | 0.171 | 842  |
| 6097 | N-acetyl-L-aspartic acid | 23 $\mu$ M | HL60 | -0.958 | -0.148 | 0.155 | 1329 |
| 6098 | aminoglutethimide        | 17 $\mu$ M | MCF7 | -0.96  | -0.143 | 0.161 | 7421 |
| 6099 | alvespimycin             | 100 nM     | HL60 | -0.963 | -0.157 | 0.148 | 1154 |
| 6100 | digoxin                  | 5 $\mu$ M  | MCF7 | -1     | -0.138 | 0.179 | 5324 |

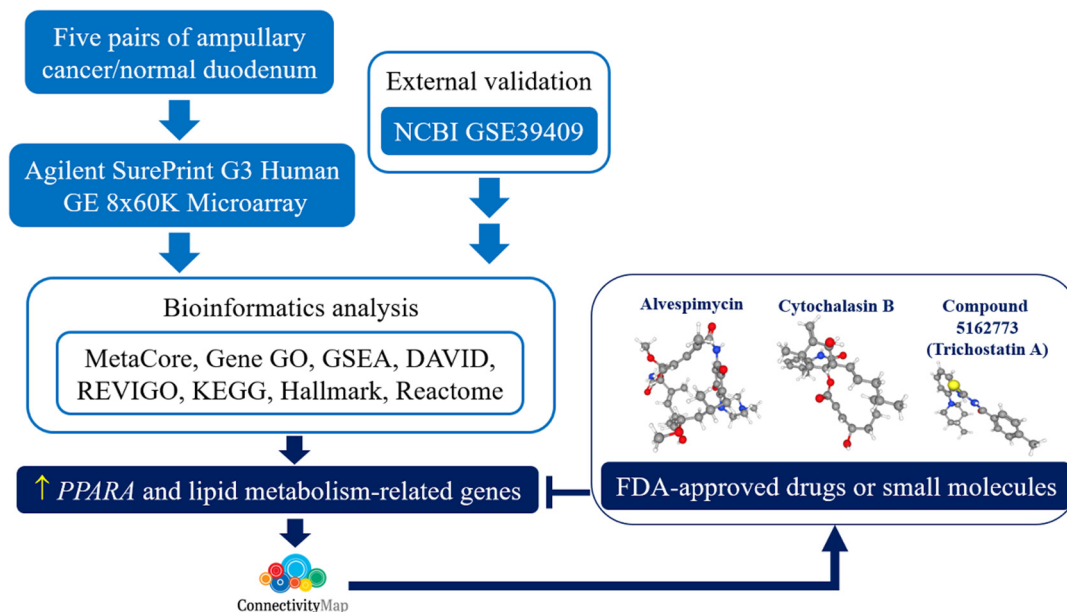

**Supplementary Figure 1. Analytical algorithm used in the present study.** The study began with a complementary (c)DNA microarray of patient samples validated by the National Center for Biotechnology Information (NCBI) dataset. Upregulated genes, peroxisome proliferator-activated receptor alpha (*PPARA*), and lipid metabolism-related genes were explored with the Connectivity Map (CMap) to find potential drugs.

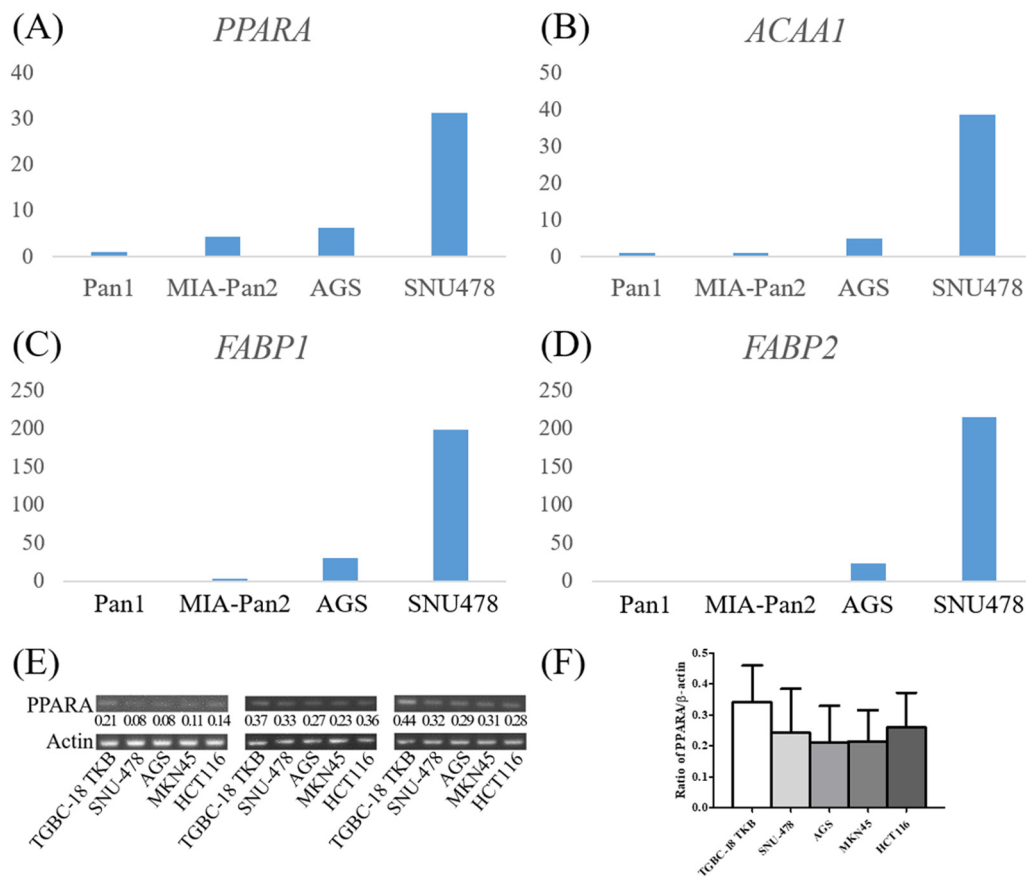

**Supplementary Figure 2. Validation of target genes in cell lines from ampullary cancer and other cancers.** mRNA expression levels of targeted genes from Figure 7 were examined in cell lines of different cancer types. (A) Expressions of *PPARA*, (B) *ACAA1*, (C) *FABP1*, and (D) *FABP2* by a qPCR. The graph represents a one-time experiment. (E) Expression of *PPARA* by a semiquantitative RT-PCR. β-actin served as a loading control. (F) Ratios of *PPARA*/β-actin in (E). The graph represents three independent experiments. Ampullary cancer cell lines: TGBC-18 TKB and SNU-478. Gastric cancer cell lines: AGS and MKN45. Pancreatic cancer cell lines: Pan1 and MIA-Pan2. Colon cancer cell line: HCT116.

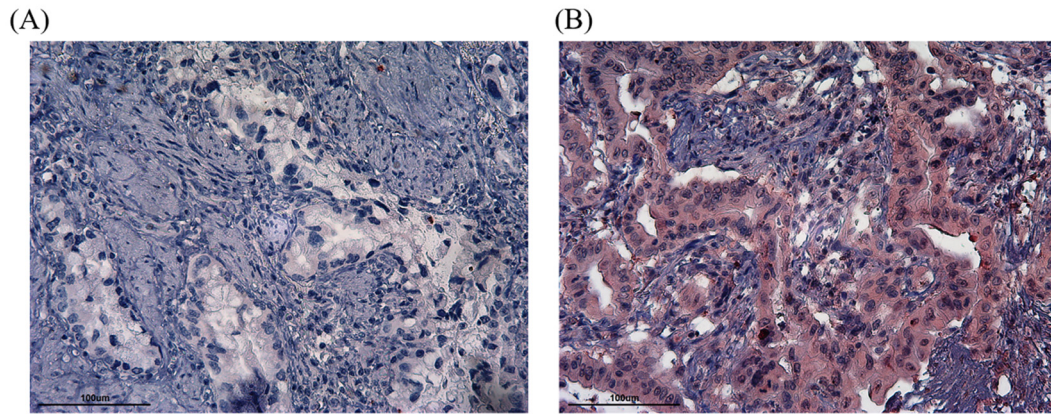

**Supplementary Figure 3. Expression of peroxisome proliferator-activated receptor alpha (PPAR- $\alpha$ ) protein in clinical samples of ampullary cancer by IHC staining. (A) Low expression of PPAR- $\alpha$  ( $\times 200$ ). (B) High expression of PPAR- $\alpha$  ( $\times 200$ ).**



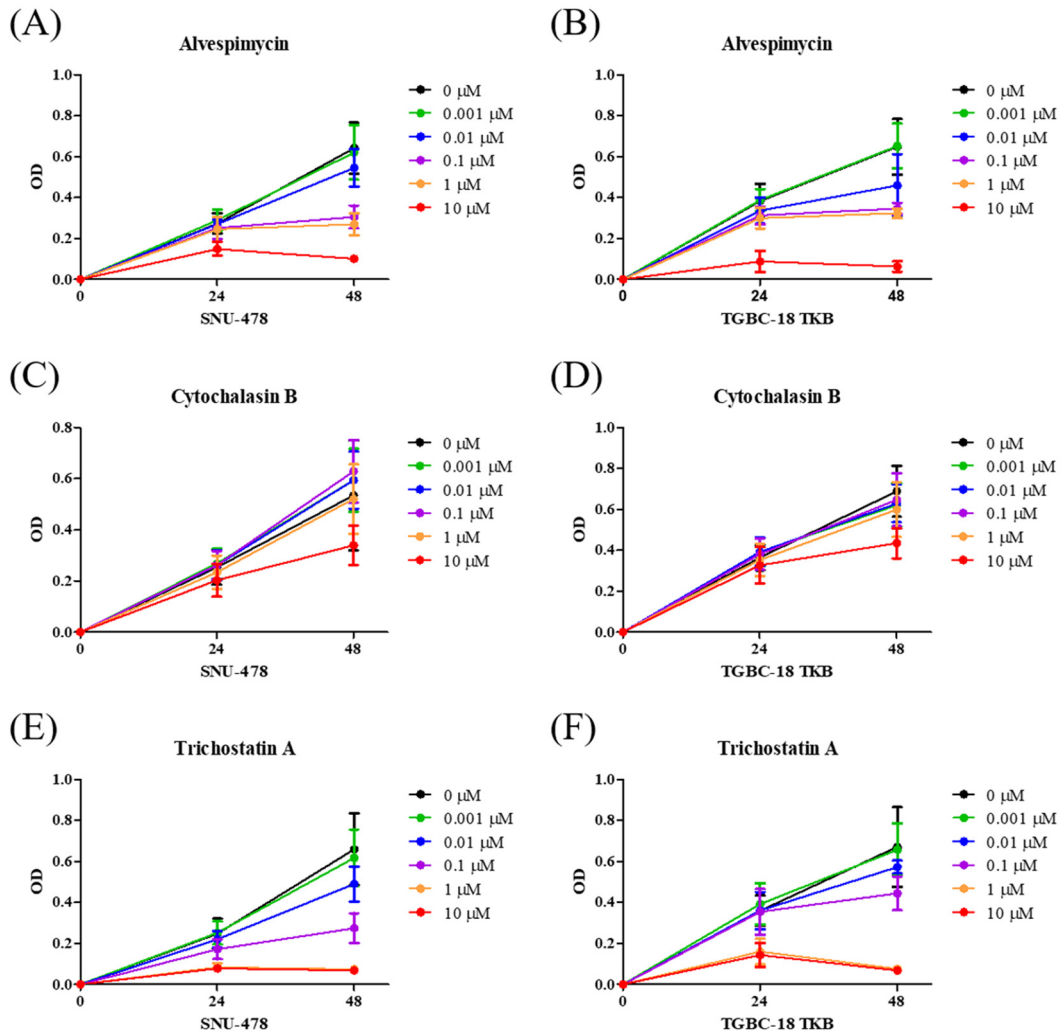

**Supplementary Figure 4. Cell proliferation assay after treatment with potential drugs from Connectivity Map (CMap).** An MTT assay was performed. (A) SNU-478 ampullary cancer cells treated with alvespimycin. (B) TGBC-18 TKB ampullary cancer cells treated with alvespimycin. (C) SNU-478 ampullary cancer cells treated with cytochalasin B. (D) TGBC-18 TKB ampullary cancer cells treated with cytochalasin B. (E) SNU-478 ampullary cancer cells treated with trichostatin A. (F) TGBC-18 TKB ampullary cancer cells treated with trichostatin A. Each graph represents three independent experiments.

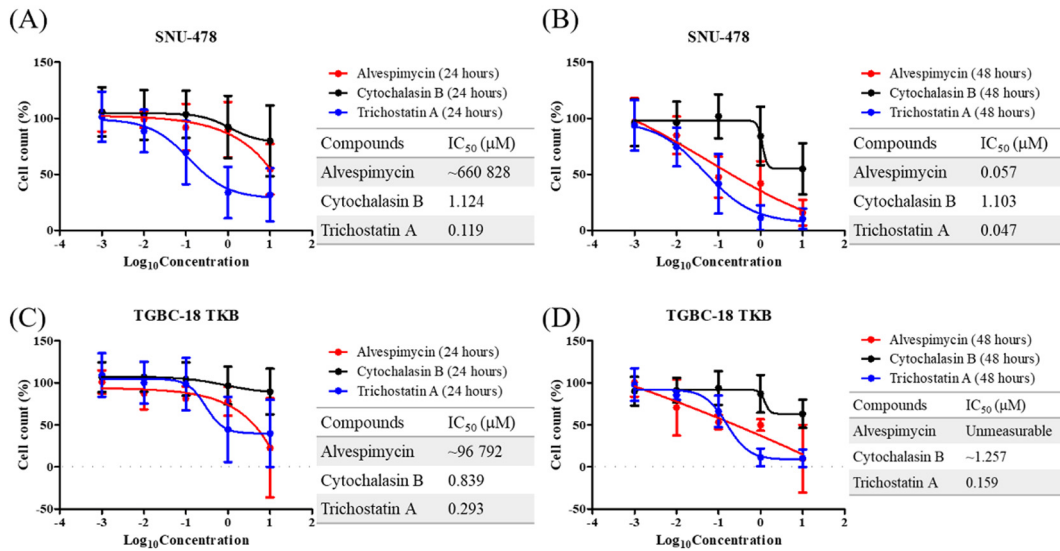

**Supplementary Figure 5. Effects of potential drugs on ampullary cancer cells.**

Ampullary cancer cells were treated with alvespimycin, cytochalasin B, or trichostatin A for 24 or 48 h, and cell growth was evaluated by an MTT assay. (A) SNU-478 cells treated for 24 h. (B) SNU-478 cells treated for 48 h. (C) TGBC-18 TKB cells treated for 24 h. (D) TGBC-18 TKB cells treated for 48 h. Values of the dose-response growth inhibitory concentration (IC<sub>50</sub>) were calculated according to a nonlinear regression curve with a variable slope. Graphs from three independent experiments with mean IC<sub>50</sub> values ± standard deviation (SD) are shown.
